1 **Plant selection and ecological microhabitat drive domestications of shrub-associated microbiomes**  
2 **in a revegetated shrub ecosystem**

3 **Zongrui Lai<sup>1\*</sup>, Yanfei Sun<sup>2</sup>, Yang Yu<sup>1</sup>, Zhen Liu<sup>3</sup>, Yuxuan Bai<sup>1</sup>, Yangui Qiao<sup>1</sup>, Lin Miao<sup>1</sup>, Weiwei**  
4 **She<sup>1</sup>, Shugao Qin<sup>1</sup>, Wei Feng<sup>1</sup>**

5 <sup>1</sup>Yanchi Research Station, School of Soil and Water Conservation, Beijing Forestry University, Beijing  
6 100083, China

7 <sup>2</sup>Key Laboratory of Genetics and Germplasm Innovation of Tropical Special Forest Trees and  
8 Ornamental Plants, Ministry of Education, College of Forestry, Hainan University, Haikou, 570228,  
9 China

10 <sup>3</sup>CAS Engineering Laboratory for Yellow River Delta Modern Agriculture, Institute of Geographic  
11 Sciences and Natural Resources Research, Chinese Academy of Sciences, Beijing, 100101, China

12

13 Corresponding Author:

14 Zongrui Lai

15 Institute: School of Soil and Water Conservation, Beijing Forestry University.

16 Address: No. 35 Qinghua Eastroad, School of Soil and Water Conservation, Beijing Forestry University,  
17 Haidian District, Beijing 100083, P. R. China

18 Tel: +86 10 62336608 (Zongrui Lai)

19 Fax: +86 10 62336172

20 E-mail: [laizr.602@gmail.com](mailto:laizr.602@gmail.com)

21 **Abstract**

22 Shrubs are used for revegetation of degraded dryland ecosystem worldwide and could recruit large  
23 numbers of microbes from the soil; however, the plant-associated microbiome assembly and the effect  
24 of plant introduction on the soil microbiomes are not fully understood. We detected shrub-associated  
25 microbes from five ecological microhabitats, including the leaves, litter, roots, rhizosphere, and root zone,  
26 across four xeric shrub plantations (*Artemisia ordosica*, *Caragana korshinskii*, *Hedysarum mongolicum*,  
27 and *Salix psammophila*). To detect the patterns of shrub-associated microbiome assembly, 16S and ITS2  
28 rRNA gene sequencing was performed. PERMANOVA and differential abundance analysis demonstrated  
29 that changes in the bacterial and fungal communities were more dependent on the microhabitats rather  
30 than on the plant species, with distinct niche differentiation. Moreover, source tracking and nestedness  
31 analysis showed that shrub-associated bacteria were primarily derived from bulk soils and slightly pruned  
32 in different microhabitats; however, a similar pattern was not found for fungi. Furthermore, the  
33 surrounding zone of roots was a hotspot for microbial recruitments of revegetated shrubs. Null model  
34 analysis indicated that homogeneous selection of determinism dominated the bacterial communities,  
35 whereas dispersal limitation and undominated process of stochasticity drove the assembly of fungal  
36 communities. Our findings indicate that ecological microhabitat of revegetated shrublands was the main  
37 predictor of the bacterial and fungal compositional variances. This study will help advance our  
38 understanding of the mechanism underlying the plant-soil microbiome feedbacks during the initial plant-  
39 establishment period in a dryland ecosystem. Further, this work provides theoretical reference for  
40 establishment and sustainable management of shrublands in drylands.

41 **Keywords:** dryland ecosystem, plant microbiomes, community assembly, plant-microbe interactions,

42 co-occurrence networks

## 43 **1. Introduction**

44 Shrubs are foundation species in fragile dryland ecosystems and performs diverse ecological  
45 functions, such as maintaining species diversity, controlling soil erosion, and promoting soil formation  
46 (Maestre et al., 2021). Each plant taxon harbours a characteristic mixture of microorganisms, collectively  
47 termed as the ‘plant microbiota’ (Xu et al., 2021; Vandenkoornhuyse et al., 2015). These plant-specific  
48 microbiomes impact the nutrition and water acquisition of xeric plants, suppress diseases, and support  
49 plant health and resistance to harsh environments (i.e., drought, salt, and high temperature) (Cordovez et  
50 al., 2019; Trivedi et al., 2020); thereby, driving plant-soil feedbacks (Delgado-Baquerizo et al., 2020).  
51 Drylands, covering approximately 40% of the Earth’s land surface, are expanding globally due to climate  
52 warming (Berg and McColl, 2021) and contain ubiquitous microbial species (Soussi et al., 2016). Many  
53 studies have focused on certain traits of soil microbes in drylands, such as the diversity, phyletic  
54 classification, and biogeography (Maestre et al., 2015; Soussi et al., 2016; Sun et al., 2020); however, the  
55 interplay between desert plants and soil microbiomes remains largely elusive, which limits the  
56 understanding of plant-soil feedback. Further, an improved understanding of the plant-soil microbiomes  
57 can improve degraded land restoration programs and increase the productivity of desert ecosystems in  
58 the future (Trivedi et al., 2019).

59 Although the soil microbiome is a common reservoir of microbes, plants (i.e., leaves, stem, and  
60 roots) provide diverse microhabitats for colonization by numerous microorganisms (Beckers et al., 2017).  
61 Plant-associated microbiomes acting as a second genome has received substantial attention in the recent  
62 years (Berg et al., 2014; Turner et al., 2013). Several studies have demonstrated that plant-associated  
63 microbial composition and functions are regulated by plant host genotype (Beckers et al., 2017; Soussi

64 et al., 2016; Vandenkoornhuise et al., 2015), i.e., each plant habitat harbours its own characteristic  
65 microbiome (Cordovez et al., 2019). Moreover, host plants can provide a number of habitats for  
66 microorganisms and then subtly affect microbiomes that confer tolerance to abiotic stress by supplying  
67 photosynthetic carbon (Müller et al., 2016; Xu et al., 2021). For example, root exudate and  
68 rhizodeposition predominantly influence the rhizosphere microbiota (Gupta et al., 2021; Zhalnina et al.,  
69 2018). In the phyllosphere, cytokinins drive the assembly and function of microbiomes (Hu et al., 2018).  
70 Recent studies indicate that plant microbiome assembly and function are profoundly affected by different  
71 seasons or plant developmental stages (Xiong et al., 2021a; Aleklett et al., 2022). In drylands, plants  
72 thrive under prolonged environmental stresses, such as high irradiance, drought, and salt accumulation,  
73 through the development of specific physiological and molecular extremophile traits (VanWallendael et  
74 al., 2019; Van Zelm et al., 2020). Previous studies have shown that large plant microbiomes, special root-  
75 associated bacteria, and fungi are also beneficial for desert plants in coping with unfavourable conditions  
76 (Soussi et al., 2016; Liu et al., 2021). Nevertheless, the mechanisms underlying the development of  
77 dryland plant microbiome remain very limited, impeding our understanding of desert ecological  
78 functions and processes.

79       Recently, niche differentiation of plant-associated microbial taxa, mainly at the soil-root interface  
80 (rhizosphere and root endosphere), has received great research attention (Trivedi et al., 2019; Xiong et  
81 al., 2021a; Wang et al., 2022). In fact, each plant tissue (fruits, seeds, flowers, leaves, stems, and roots)  
82 and soil habitat (rhizosphere and litter) provide unique ecological niche that supports a characteristic  
83 microbial community (Gupta et al., 2021; Vandenkoornhuise et al., 2015; Xu et al., 2021). Potentially,  
84 different microhabitats reflect different biotic (substrate and organic matter) and abiotic (temperature and  
85 water availability) conditions (Müller et al., 2016; Zheng and Gong., 2019). Compared to other humid

86 ecosystems, dryland ecosystems have greater differences in biotic and abiotic conditions across  
87 microhabitats (Soussi et al., 2016; Trivedi et al., 2019). However, such interactions in dryland ecosystems  
88 remain to be elucidated.

89 Furthermore, recent studies suggest that the formation and development of microbial communities  
90 across microhabitats are not only controlled by environmental factors but are also strongly interrelated  
91 with each other (Zheng and Gong, 2019; Bernard et al., 2021; Walsh et al., 2021). Generally, members  
92 of the microbiome are horizontally acquired from the surrounding environments where the initial and  
93 main reservoir is the soil (Cordovez et al., 2019; Xiong et al., 2021a), while others migrate vertically via  
94 parents of the host plants (Vandenkoornhuysse et al., 2015). The belowground plant compartments harbour  
95 more microbes than aboveground plant tissues (Zheng and Gong, 2019), and the rhizosphere, a 1 mm  
96 thin zone of soil that surrounds fine roots, is more enriched with microbes than the bulk soil (Philippot  
97 et al., 2013). Thus, plant-associated microbes are selectively recruited by the plants, and the plant  
98 compartment defines the composition of the microbiomes. Taxonomic and genomic analyses have shown  
99 that there are overlapping microbial communities among different plant compartments (Cordovez et al.,  
100 2019; Edwards et al., 2015). For example, although the leaves and roots of *Arabidopsis thaliana* (L.)  
101 Heynh. have specific microbiota members, they have a part of similar functional diversities (Bai et al.,  
102 2015). Whether microbial functional overlap is attributed to the migration of microorganisms among the  
103 different compartments, and whether these compartment microbiome assemblies are mainly influenced  
104 by the soil microbiome, remain to be elucidated (Turner et al., 2013; Xu et al., 2021). Therefore,  
105 clarifying the diversity, abundance, composition, and dynamics of each microhabitat is helpful for  
106 improving the understanding of plant-environment interactions (Bulgarelli et al., 2012).

107 In drylands, woody plants are widely revegetated and shrubs, being the frontier species, are

108 frequently adopted worldwide to combat desertification and to maintain sand dune stability (Zastrow,  
109 2019). Notably, revegetation not only improve the microenvironment, but also increase plant material  
110 input to soil (Arneth et al., 2021); however, the effect of revegetation on the assembly of plant-associated  
111 and soil microbiome should be explored. In 2011, permanent plots (*Artemisia ordosica*, *Caragana*  
112 *korshinskii*, *Hedysarum mongolicum*, and *Salix psammophila* plantations) were established in the study  
113 site. We found that the effect of fine roots on soil organic carbon varied across the shrublands, and soil  
114 microbial diversity and composition were also significantly different (Lai et al., 2016; Liu et al., 2018;  
115 Sun et al., 2020). Therefore, a multi-plant experiment was performed in the same permanent plots. An  
116 adjacent bare sandy land, land before revegetation, served as a control in this study. We aimed to observe:  
117 (1) a drastic microbial community differentiation among the four revegetated shrubs; (2) distinct bacterial  
118 and fungal communities and compositions across different plant species and microhabitats (phylloplane,  
119 detritusphere, root rhizoplane, rhizosphere soil, and root zone soil) and the largest microbial species  
120 reservoir found in bulk soil. Consequently, we tried to identify the mechanisms involved in the assembly  
121 processes of the plant-associated microbiomes.

## 122 **2. Materials and methods**

### 123 *2.1. Field experiment and sampling*

124 In 2001, four desert shrub populations, which include *A. ordosica*, *C. korshinskii*, *H. mongolicum*,  
125 and *S. psammophila*, were planted on bare sandy land at the Yanchi Research Station (37° 42' 31" N/107°  
126 13' 47" E, 1,530 m above sea level, shrubland details see Lai et al. 2016), located in the Mu Us Desert,  
127 Ningxia, China were used in this study. The study area was fenced to avoiding livestock grazing and  
128 anthropogenic disturbance. The long-term mean annual temperature was 8.1 °C, ranging from -8.4–  
129 22.7 °C, and the mean annual precipitation was 292 mm at this study site (Liu et al., 2018). All selected

130 shrubs were synchronously planted in the same field, which was characterised by sandy soil and subjected  
131 to the same management practices (Sun et al., 2020). The field experiments (four shrubland plots and  
132 one bare sandy land) were performed in August 2018 (Table S1), when the shrubs grow vigorously. For  
133 sampling, twelve 10 m × 10 m plots were randomly selected in each shrublands. The distance between  
134 plots was range from 10 m to 100 m. The leaves (matured, 15 g), detritus (twig and leaf litter, 15 g), fine  
135 roots (< 2 mm, 15 g), soil from the rhizosphere (surrounding the fine roots, 50 g) and the root zone (under  
136 the canopy, 50 g) from three healthy shrubs in each plot (samples from three shrubs were mixed and  
137 formed a pooled sample), and bulk soil (50 g) from bare sandy land were carefully collected in a single  
138 day, using disposable gloves to avoid contamination. Root and soil samples were collected from four soil  
139 profiles (40 cm × 40 cm × 40 cm) around the shrub at a distance of 0.2 – 1.0 m. Bulk soils from the same  
140 depth were randomly collected from the bare sandy land plot adjacent to other plots. Twelve samples per  
141 sample type (soil and plant) were collected for two days (10–11 August). All samples were stored  
142 separately in sealed 50-mL centrifuge tube, immediately transported to the Magigene Biotechnology Lab  
143 (Guangzhou, Guangdong Province) on dry ice within 48 h and store at –70 °C until further molecular  
144 analyses.

## 145 2.2. DNA extraction and sequencing

146 All frozen samples were transported on dry ice to maintain a temperature below 4 °C for DNA  
147 extraction and sequencing as soon as possible after field sampling (within a week). Visible soil debris in  
148 plant tissues (leaf, detritus, and root) were washed using distilled water. Then, approximately 1 g of  
149 crushed plant tissue and 0.5 g of soil sample were used to extract DNA using the MoBio PowerSoil®  
150 DNA Isolation Kit (MoBio Laboratories, Inc., Carlsbad, CA, USA) and DNA samples were placed  
151 randomly across plates. The concentration and purity of all extracts were measured using the NanoDrop

152 One (Thermo Fisher Scientific, MA, USA) and quantified again prior to polymerase chain reaction (PCR)  
153 (Agler et al., 2016).

154 A two-step barcoded PCR protocol was used to maximise the phylogenetic coverage of bacteria and  
155 fungi (Bai et al., 2015; Lundberg et al., 2013). Primers for the tagging the bacterial and fungal amplicons  
156 were 515F/806R (515F: 5'-GTGCCAGCMGCCGCGGTAA; 806R: 5'-  
157 GGACTACHVGGGTWTCTAAT) and ITS5-1737F/ITS2-2043R (ITS5-1737F:  
158 GGAAGTAAAAGTCGTAACAAGG; ITS2-2043R: GCTGCGTTCTTCATCGATGC), respectively,  
159 and were used in equal concentrations (Ihrmark et al., 2012; Kembel et al., 2014). After PCR  
160 amplification, the length and concentration of amplicons were detected using 1% agarose gel  
161 electrophoresis. The PCR products were purified using the EZNA<sup>®</sup> Gel Extraction Kit (Omega Bio-Tek,  
162 Doraville, USA). Sequencing libraries were generated using NEBNext<sup>®</sup> Ultra<sup>™</sup> DNA Library Prep Kit  
163 for Illumina<sup>®</sup> (New England Biolabs, MA, USA). Illumina MiSeq sequencing was carried out on the  
164 IlluminaHiSeq2500 platform (Illumina Inc., San Diego, CA, USA) using 2×250 bp.

165 Quality filtering of paired-end raw reads and assembly of paired-end clean reads were performed  
166 using Trimmomatic v0.33 (<http://www.usadellab.org/cms/?page=trimmomatic>) and FLASH v1.2.11  
167 (<https://ccb.jhu.edu/software/FLASH/>), respectively (Durán et al., 2018). Raw tag quality control was  
168 analysed using Mothur V1.35.1 (<http://www.mothur.org>) (Schloss et al., 2009). Operational taxonomic  
169 unit (OTU) clustering, species annotation, and phylogenetic relationship construction were performed  
170 using a combination of USEARCH v10 (Caporaso et al., 2010), KRONA, GraPhlAn, QIIME v1.9.1, and  
171 R v3.6.3 software. Contaminant sequences (e.g., protista, archaea, chloroplast, mitochondrial, and  
172 viridiplantae sequences) were filtered from the data set (Edgar, 2010). Sequences were assigned to  
173 taxonomy based on a 97% sequence similarity threshold (Gunnigle et al., 2017). In total, 17, 954, 236



174 bacterial and 14, 207, 200 fungal high-quality raw reads from 252 samples. A total of 10,000 and 20,000  
175 reproducible and measurable OTUs for bacteria and fungi, respectively, were included in the complete  
176 datasets, and the full dataset was split into phylloplane, detritosphere, root rhizoplane, rhizosphere, root  
177 zone soil, and bulk soil sub-datasets to examine the differences among the shrub species (DeSantis et al.,  
178 2006). Samples from the microhabitats (i.e., leaf, detritus, root, and soil) were rarefied separately to  
179 minimise sample loss (bacteria: 34528 reads; fungi: 28374 reads). All analyses conducted had six  
180 replicates. All DNA-sequencing data were uploaded to the NCBI Sequence Read Archive (SRA) with  
181 the accession number SRP348383.

### 182 2.3. *Statistical analyses*

183 All the data and Figureures were run in the R statistical software v3.6.3 (The R Foundation for  
184 Statistical Computing, Vienna, Austria; <http://www.r-project.org>). Data normality was examined using  
185 the Shapiro–Wilk rank sum test. PROC UNIVARIATE was used to test normality of distribution and  
186 homogeneity of variance for residuals. To satisfy the homoscedasticity assumption, OTUs were  
187 normalised using variance-stabilizing transformation. Statistical significance was determined at  $\alpha = 0.05$ ,  
188 and when necessary, *P* values for multiple comparisons were corrected using sequential Bonferroni  
189 correction. The differential abundance, richness, and  $\alpha$ -diversity across species and microhabitats  
190 were identified using two-way ANOVA models (the aov R function). For each ANOVA model, multiple  
191 comparisons were FDR-corrected. Significant differences between shrub species or microhabitats were  
192 evaluated with the Kruskal-Willis rank sum test (kruskal.test with dunn.test in R; FDR-corrected  $p <$   
193 0.05). Normality of the diversity data was checked with the Shapiro-Wilk test. If the data was skewed,  
194  $\log_{10}$ -transformed data were used to statistical analysis. Differential abundances for bacteria and fungi in  
195 each shrubland and microhabitat compared with bare sandy land were determined using DESeq2 (Love

196 et al., 2014), with FDR-corrected  $p < 0.05$  considered significant.

197 To determine the differences in the microbial community, Bray-Curtis dissimilarity matrices were  
198 calculated and then visualised with non-metric dimensional scaling (NMDS) ordinations. Permutational  
199 multivariate analysis of variance (PERMANOVA) pairwise comparisons were conducted using the  
200 adonis function in the R package *vegan* with 999 permutations for bacteria and fungi for statistically  
201 supporting the visual clustering results of the NMDS analyses (Oksanen et al., 2019). The co-occurrence  
202 network was constructed using the IGRAPH package in R, based on Spearman's rank correlations of all  
203 OTUs, accompanied by the calculations of the descriptive and topological network properties (Hartman  
204 et al., 2018), and visualised the significant correlations (Spearman's  $r > 0.6$  or  $r < -0.6$ ,  $p < 0.01$ ) in  
205 GEPHI v.0.9.2 (<https://gephi.org/>). The average degree (the number of direct correlations to a node) is  
206 defined as the network complexity.

207 SourceTracker, based on Bayesian approach, was performed to evaluate the source of the plant  
208 microbial communities in each habitat (Knights et al., 2011; Xiong et al., 2021b). To further support the  
209 microbial source analysis, nestedness analysis was performed. The temperature statistics ( $T$ , smaller the  
210  $T$  value, perfect the nestedness), based on pairwise compositional difference, and the nestedness metric,  
211 based on overlap and decreasing fill, were calculated using the R packages *vegan* and *bipartite* (Bernard  
212 et al., 2021).

213 Null model and  $\beta$ NTI ( $\beta$ -nearest taxon index metrics) analyses were calculated using the *picante* R  
214 package for distinguishing different community ecological processes, including deterministic ( $|\beta\text{NTI}| >$   
215  $2$ ) and stochastic process ( $|\beta\text{NTI}| > 2$ ) (Kembel et al., 2010). Specifically, based on the  $\beta$ NTI and the  
216 Bray-Curtis-based Raup-Crick ( $\text{RC}_{\text{bray}}$ ), the two ecological processes were divided into five processes:  
217 heterogeneous selection ( $\beta\text{NTI} < -2$ ), homogeneous selection ( $\beta\text{NTI} > +2$ ), dispersal limitation ( $|\beta\text{NTI}| <$

218 2 and RCBray > 0.95), homogenizing dispersal ( $|\beta\text{NTI}| < 2$  and RCBray < -0.95), and undominated  
219 ( $|\beta\text{NTI}| < 2$  and  $|\text{RCBray}| < 0.95$ ) (Tripathi et al., 2018).

### 220 3. Results

#### 221 3.1. Effects of revegetated shrubs on microbial communities

222 A total of 48 bacterial phyla were observed in both shrub-associated and bulk soil samples. The  
223 bacterial communities were dominated by Proteobacteria, Actinobacteria, Bacteroidetes, Acidobacteria,  
224 Chloroflexi, and Planctomycetes (Figure. 1a). Notably, Cyanobacteria and Tenericutes were highly  
225 abundant in the *S. psammophila* samples. In the bare sandy land plot, Gemmatimonadetes and  
226 Planctomycetes also were the dominant bacterial phyla. Specifically, the shrub microhabitats recruited  
227 Fusobacteria, which were not detected in the bulk soil samples. At the family level, *Burkholderiaceae*,  
228 *Chitinophagaceae*, and *Sphingomonadaceae* were the top three families in the bacterial assemblage in  
229 shrub samples, while the following taxonomic ranks were dramatically different. In the fungal family,  
230 the taxonomic ranks varied markedly across shrub and bare sandy land samples. Moreover, nine fungal  
231 phyla were found in all the samples (Figure. 1b). Ascomycota was the most abundant phylum in all the  
232 samples, whereas Basidiomycota, Chytridiomycota and unclassified taxa were highly abundant in bulk  
233 soil samples. Additionally, Blastocladiomycota only was found in *C. korshinskii* and *S. psammophila*  
234 samples.

235 The  $\alpha$ -diversity of bacteria and fungi (Observed species, Chao1 index, Shannon diversity index, and  
236 Goods coverage) were not significantly different across shrub plantations ( $p > 0.05$ ; Figure. S1). However,  
237 bacterial Goods coverage in *A. ordosica* samples was lower than that in *S. psammophila* ( $p < 0.01$ ; Figure.  
238 S1a). Beta-diversity based on average Bray-Curtis distances was markedly different across four shrub  
239 plantations and shrub species explained far greater variation in fungal community composition (Adonis:

240 degree of freedom (d.f.) = 3; coefficient of determination ( $R^2$ ) = 0.087;  $p < 0.001$ ) than in bacterial

241 community composition (Adonis: d.f. = 3;  $R^2$  = 0.033;  $p < 0.001$ ; Figures. 2a and b; Table 1).

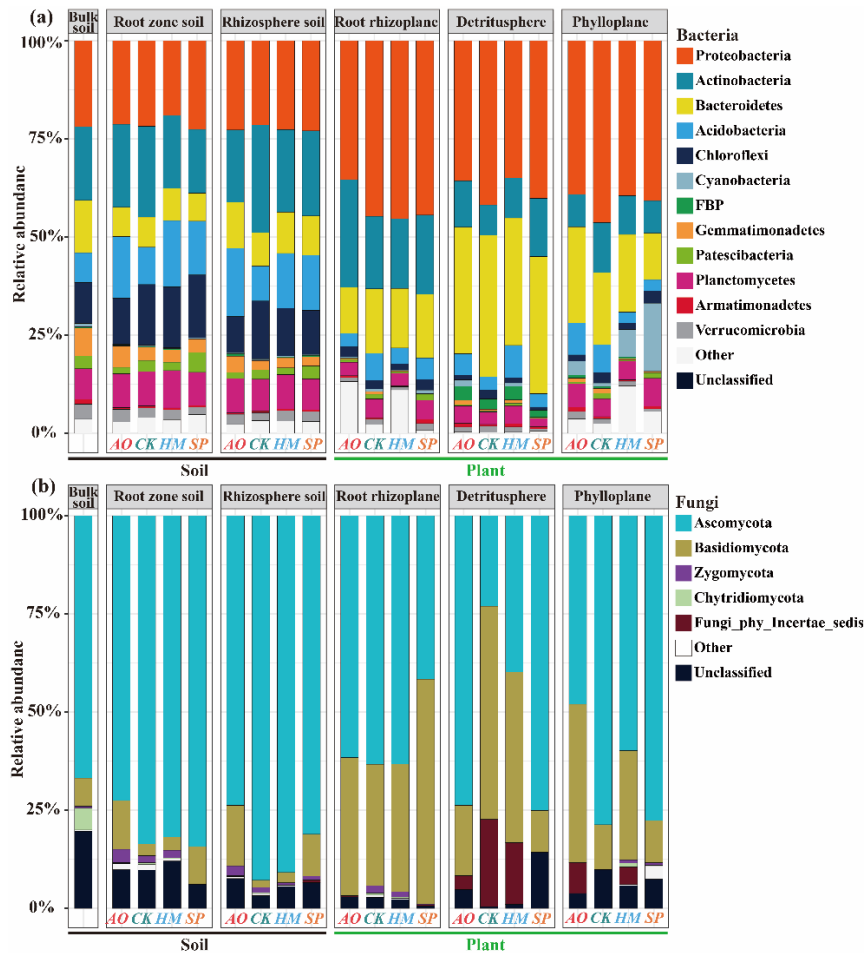

242

243 **Figure 1.** Relative sequence abundance of bacterial (a) and fungal (b) phyla associated with six  
 244 microhabitats (bulk soil, root zone soil, rhizosphere soil, root rhizoplane, detritusphere, and phylloplane)  
 245 across four shrublands (*A. ordosica*, *C. korshinskii*, *H. mongolicum*, and *S. psammophila*;  $n = 12$ ) and  
 246 bare sandy land ( $n = 12$ ). Operational taxonomic unit with relative abundance  $< 0.1\%$  were discarded.

247

248 **Table 1** PERMANOVA (Bray-Curtis distance) analysis showing the ability of variables to explain  
 249 compositional variance.

| Domain   | Variable                   | $df$ | $R^2$ | $P$              | Residual |
|----------|----------------------------|------|-------|------------------|----------|
| Bacteria | Host                       | 3    | 0.033 | <b>&lt;0.001</b> | 236      |
|          | Microhabitat               | 5    | 0.304 | <b>&lt;0.001</b> | 246      |
|          | Host $\times$ Microhabitat | 19   | 0.427 | <b>&lt;0.001</b> | 220      |
| Fungi    | Host                       | 3    | 0.087 | <b>&lt;0.001</b> | 236      |
|          | Microhabitat               | 5    | 0.222 | <b>&lt;0.001</b> | 246      |
|          | Host $\times$ Microhabitat | 19   | 0.530 | <b>&lt;0.001</b> | 220      |

250  $df$ : degree of freedom.  $R^2$ : coefficient of determination. Significant  $p$ -values ( $p < 0.05$ ) are indicated in

251 bold texts.

252

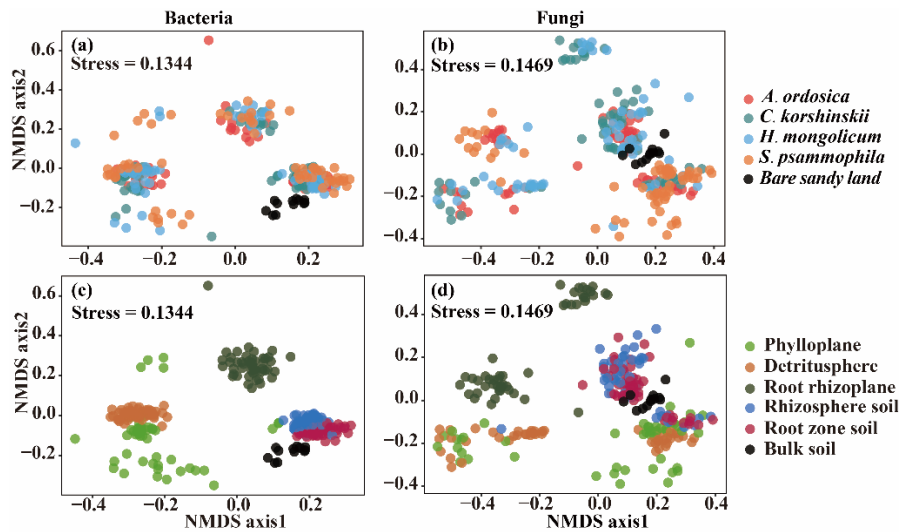

253

254 **Figure 2.** Factors shaping the composition of microbial community of xeric shrubs. (a) and (b) Non-  
255 metric multidimensional scaling plots of bacterial and fungal community dissimilarity with shapes by  
256 four shrub species (*A. ordosica*, *C. korshinskii*, *H. mongolicum*, and *S. psammophila*) and bare sandy  
257 land. (c) and (d) Non-metric multidimensional scaling plots of bacterial and fungal community  
258 dissimilarity with shapes by six microhabitats (bulk soil, root zone soil, rhizosphere soil, root rhizoplane,  
259 detritusphere, and phylloplane).

260

261 The DESeq2 differential abundance analysis showed that approximate 5.1% of bacterial OTUs and  
262 4.5% of fungal OTUs, mainly belonged to the bacterial families *Sphingomonadaceae* and  
263 *Chitinophagaceae*, and the fungal families *Pezizomycotina\_fam\_Incertae\_sedis* and *Trichocomaceae*,  
264 respectively, were significantly enriched in four revegetated shrublands (Figure. 3; Table S2). We also  
265 found that approximate 8.2% of bacterial OTUs and 4.5% of fungal OTUs significantly depleted in four  
266 revegetated shrublands, these OTUs were mainly from the bacterial families *Gemmataceae* and  
267 *Gemmatimonadaceae*, and the fungal family *Pezizomycotina\_fam\_Incertae\_sedis* (Figure. 3; Table S2).  
268 Specially, *S. psammophila* possessed the lowest numbers of enriched OTUs for bacteria, while *A.*

269 *ordosica* possessed the greatest numbers of enriched OTUs for fungi.

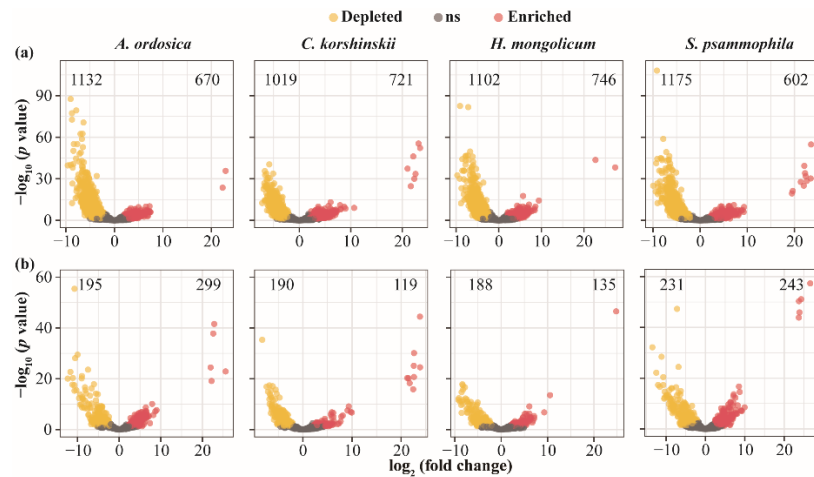

270

271 **Figure 3.** The volcano plot illustrating the enrichment and depletion patterns of the shrub-associated  
272 bacterial (a) and fungal (b) communities in different revegetated shrublands (*A. ordosica*, *C. korshinskii*,  
273 *H. mongolicum*, and *S. psammophila*) compared with bare sandy land.

274

### 275 3.2. Niche differentiation of shrub-associated microbiota across different microhabitats

276 The dominant bacterial and fungal phyla dramatically differed across the microhabitats (phylloplane,  
277 detritosphere, root rhizoplane, rhizosphere soil, root zone soil, and bulk soil;  $p < 0.01$ ; Figure. 1).  
278 Proteobacteria and Bacteroidetes had higher abundance in plant tissue samples than soil samples, but the  
279 abundance of Acidobacteria and Planctomycetes were lower in plant tissue samples ( $p < 0.001$ ).  
280 Specifically, Proteobacteria, Bacteroidetes, Actinobacteria, Acidobacteria, and Planctomycetes (average  
281 across shrub species;  $n = 12$ ) were abundant in all microhabitats, whereas Cyanobacteria, FBP,  
282 Tenericutes, and Chloroflexi were more abundant in leaves, detritus, roots, and soils, respectively,  
283 compared to other microhabitats (Tukey's honestly significant difference test:  $p < 0.01$ ). Ascomycota and  
284 Basidiomycota were the most dominant, accounting for approximately 85% of the sequences.  
285 Interestingly, more fungal phyla were detected in the leaf samples than in the other samples.

286 Blastocladiomycota was only detected in leaf samples of *C. korshinskii* and *S. psammophila*.

287 The Observed species, Chao1 index, Shannon index, and Goods coverage values showed a similar  
288 trend for bacterial  $\alpha$ -diversity among microhabitats, with a significant difference between the soil  
289 microhabitats (rhizosphere, root zone, and bulk soil) and the plant tissue microhabitats (root rhizoplane,  
290 detritosphere, and phylloplane) (Kruskal–Wallis test and Dunn’s post-hoc test,  $p < 0.001$ ; Figure. S2).  
291 Specially, in the plant tissue microhabitats, the Observed species and Shannon index of the detritosphere  
292 were significantly higher than other microhabitats ( $p < 0.05$ ). In the soil microhabitats, the root-associated  
293 soil had greater Chao1 index than bulk soil did ( $p < 0.01$ ). For fungi, the  $\alpha$ -diversity index had a  
294 dramatical difference between detritosphere and other microhabitats, with a slight difference in Observed  
295 species and Shannon index (Figure. S2b).

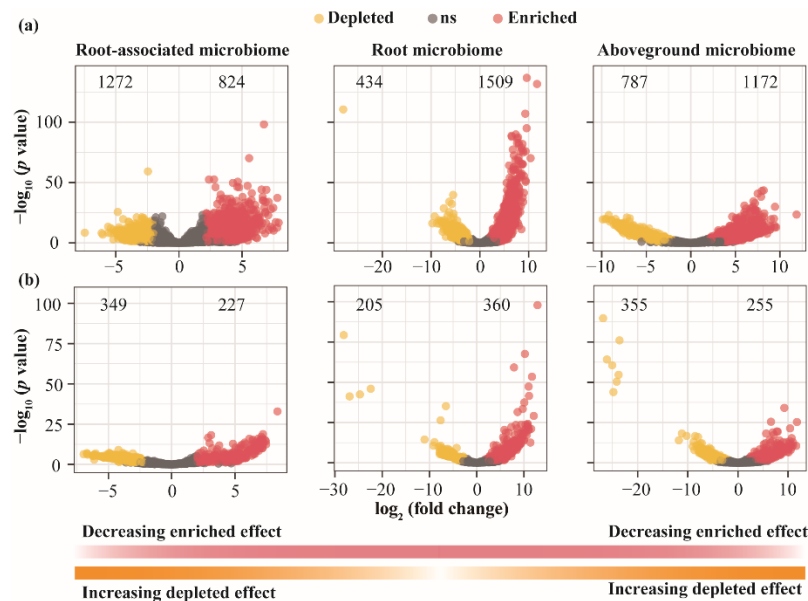

296

297 **Figure 4.** The volcano plot illustrating the enrichment and depletion patterns of the shrub-associated  
298 bacterial (a) and fungal (b) communities in six microhabitats (phylloplane, detritosphere, root rhizoplane,  
299 rhizosphere soil, and root zone soil) compared with bulk soil.

300 The differential abundance analysis demonstrated that root rhizoplane possessed the greatest  
301 numbers of enriched OTUs, mainly from the bacterial family *Gemmataceae* and the fungal family

302 *Pezizomycotina\_fam\_Incertae\_sedis* (Figure. 4; Table S3). Meanwhile, the lowest numbers of depleted  
303 OTUs, mainly belonged to the bacterial family *Chitinophagaceae* and the fungal family *Thelephoraceae*  
304 was also observed in root rhizoplane (Figure. 4; Table S3). In soil microhabitats (rhizosphere and root  
305 zone soil), the enriched OTUs for bacteria and fungi were mainly assigned to the families  
306 *Gemmatimonadaceae* and *Gemmataceae*, and *Spizellomycetaceae* and *Lasiosphaeriaceae*, respectively.  
307 Compared to soil microhabitats, the aboveground microhabitats (detritusphere and phylloplane) had the  
308 greater numbers of the enriched OTUs, mainly from the bacterial families *Gemmatimonadaceae* and  
309 *Pirellulaceae*, and the fungal families *Pezizomycotina\_fam\_Incertae\_sedis* and *Trichocomaceae* (Table  
310 S3).

311 Microhabitat was the primary factor explaining the variation in shrub-associated microbial  
312 community composition (Adonis: d.f. = 5; bacteria:  $R^2 = 0.30$ ;  $P < 0.001$ ; fungi:  $R^2 = 0.22$ ,  $p < 0.001$ ;  
313 Table 1). PERMANOVA, conducted separately for shrubs, indicated that the microbial community  
314 composition significantly varied among different microhabitats (Table S4;  $p < 0.01$ ). Community  
315 similarity analysis showed that rhizosphere, root zone, and bulk soil samples were closely related to each  
316 other and detritus samples were the most similar to leaf samples. In addition, root rhizoplane samples  
317 were dissimilar to the other samples.

318 The network analysis showed that microbial co-occurrence patterns differed distinctly across six  
319 microhabitats, particularly for the bulk soil and root rhizoplane (Figures. 5a and b, Tables S5 and S6).  
320 Bacterial network in bulk soils was the most complex, followed by phylloplane and root-associated  
321 microhabitats (root zone soils, root rhizoplane, and rhizosphere soils), with the lowest bacterial network  
322 complexity in the detritusphere. For fungi, the highest and lowest network complexity was found in the  
323 root rhizoplane and rhizosphere soils, respectively. The network complexity in bulk soils was greater



324 than that in other microhabitats (phylloplane > detritosphere > root zone soils), and the highest  
325 modularity and the lowest average path distance were observed in the bulk soil. We defined the “network  
326 hubs” (degree > 50; closeness centrality > 0.3) in the network, and found 1038 network hubs (bacteria:  
327 697, fungi: 341) at bulk soil, and 157 network hubs (bacteria: 0, fungi: 157) at root rhizoplane, and 51  
328 network hubs (bacteria: 0, fungi: 51) at detritosphere (Figure. 5c, Table S5). In the bacterial network, a  
329 half of nodes were assigned to the top 3 phyla (Proteobacteria, Planctomycetes, Actinobacteria) in soil  
330 microhabitats (bulk soil, root zone soil, rhizosphere soil), whereas in plant microhabitats (root rhizoplane,  
331 detritosphere, phylloplane) the top-three phyla were Proteobacteria, Bacteroidetes, and Actinobacteria  
332 (Figure. 5b, Table S6). For fungi, two phyla (Ascomycota and Basidiomycota) were identified in nodes,  
333 accounting for approximate 80% of all nodes. Remarkably, Zygomycota and Glomeromycota were not  
334 detected in network nodes of detritosphere (Figure. 5b, Table S6).

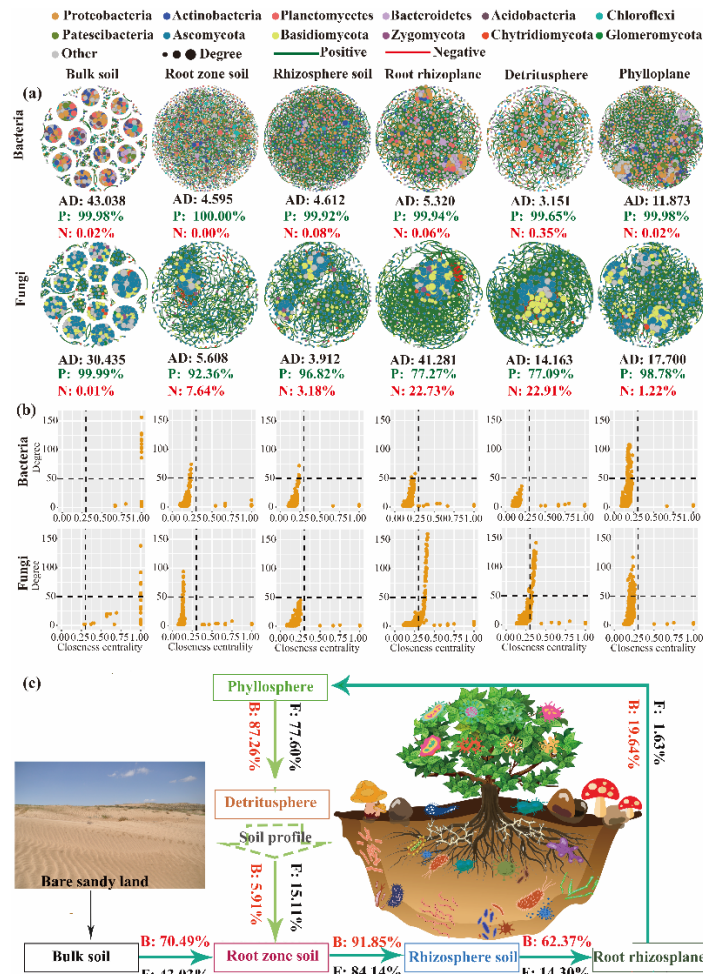

335

336 **Figure 5.** Spatial dynamics of xeric shrub-associated microbiomes. (a) Bacterial and fungal co-

337 occurrence networks along the soil-plant continuum (n = 48). AD: average degree. Different colours

338 represent microbial phyla. (b) Distribution patterns of the hub nodes (degree > 50; closeness centrality >

339 0.3) of bacterial and fungal network in different microhabitats. (c) Source model analysis based on the

340 SourceTracker showing the potential sources of xeric shrub-associated microbiota (n = 48).

341

### 342 3.3. Potential sources of shrub-associated microbiota

343 The SourceTracker analyses suggested that root-associated bacterial communities were mainly

344 derived from bulk soils and gradually transmitted to different belowground microhabitats (Figure. 5c).

345 Nevertheless, similar source patterns were not observed in root-associated fungal communities. Plant

346 tissue niches accounted for a smaller proportion of derivation of fungal communities than of bacterial  
347 communities. Phylloplane, the main potential source of detritosphere, acquired a minority of taxa from  
348 the belowground species pool (bacteria: 19.64%, fungi: 1.63%). Conversely, the aboveground species  
349 pool was also a potential source of soil microhabitats, specifically, the detritosphere contributed 5–15%  
350 of sources to the subterranean microbiotas (Figure. S5). Nestedness analysis also showed that bacterial  
351 communities were more perfectly nested by habitats than fungal communities (bacteria:  $T = 9.74^\circ$ ,  $P =$   
352  $0.01$ , NODF = 19.28%; fungi:  $T = 31.38^\circ$ ,  $P = 0.01$ , NODF = 57.61%), with rhizosphere soils having the  
353 highest microbial diversity. Specifically, fungal communities in the phylloplane were an important  
354 species subset.

#### 355 *3.4. Assembly processes of shrub-associated microbiomes*

356 Null model analyses revealed that the relative importance of determinism vs. stochasticity in shrub-  
357 associated bacterial and fungal communities varied across six microhabitats (Figure. 6). After quantifying  
358 the deviation in  $\beta$ NTI values, we observed that deterministic assembly processes, especially  
359 homogeneous selection, represented a predominantly higher percentage than stochastic assembly  
360 processes in bacterial communities, while the stochastic assembly processes (dispersal limitation and  
361 undominated processes) were dominant in fungal communities (Figure. 6). Notably, for belowground  
362 habitats, the relative contribution of determinism and stochasticity showed a slightly increasing tendency  
363 from bulk soil to root rhizoplane in bacterial and fungal communities, respectively (Figure. 6a).

364

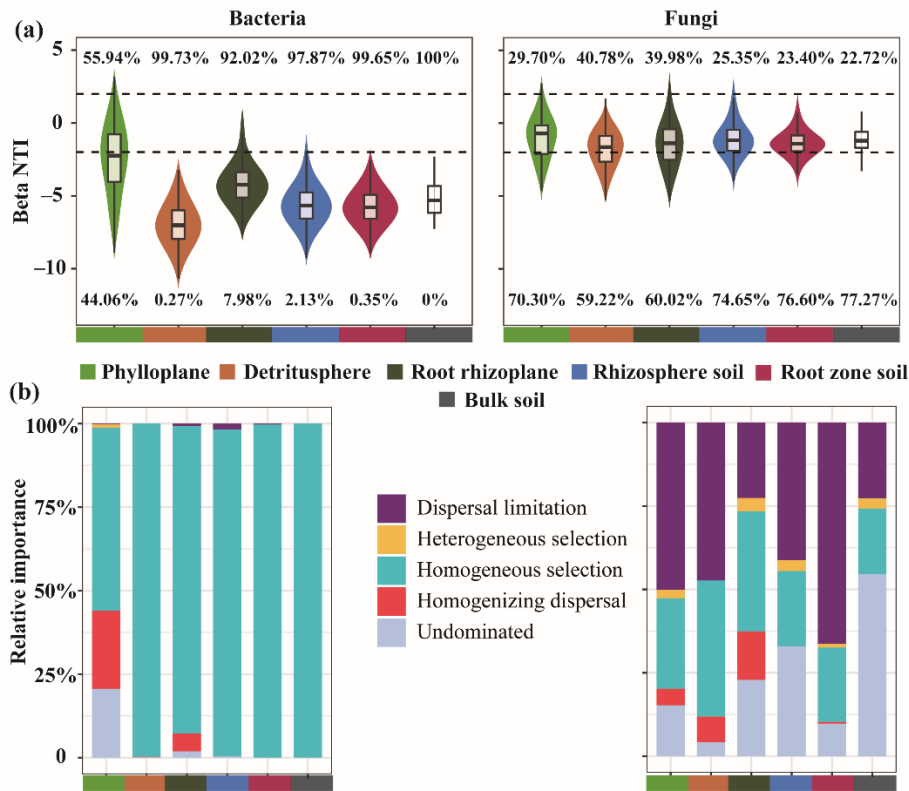

365

366 **Figure 6.** Bacterial and fungal community assembly processes in six microhabitats. (a) The values of the  
 367  $\beta$ -Nearest Taxon Index value ( $\beta$ NTI) for shrub-associated microbial communities. Dashed lines represent  
 368 upper and lower significant thresholds at  $\beta$ NTI = -2 and +2, respectively. (b) The fraction of shrub-  
 369 associated microbial community assembly governed principally by deterministic processes  
 370 (heterogeneous selection and homogeneous selection) or stochastic processes (dispersal limitation,  
 371 homogenizing dispersal, and undominated processes).

## 372 4. Discussion

### 373 4.1. Shrubs harbour different microbial communities across different microhabitats

374 Although the  $\alpha$ -diversity analysis indicated that there were no dramatic differences across four  
 375 shrublands, results of PERMANOVA and differential abundance analysis supported the first two  
 376 hypotheses that the four revegetated shrub species recruit markedly distinct bacterial and fungal  
 377 communities after colonisation on bare sandy land, with a great difference in microbial compositions  
 378 across microhabitats (phylloplane, detritusphere, root rhizoplane, rhizosphere soil, and root zone soil;

379 Figures. 1–4, S1–S4). In addition, niche differentiation, rather than plant species, shaped the diversity  
380 and structure of microbiomes (Table 1). Previous studies have shown that the introduction of shrubs on  
381 bare sandy land changed the abundance, diversity, and composition of soil bacterial and fungal  
382 communities in the degraded dryland ecosystem (Cregger et al., 2018; Sun et al., 2019), whereas our  
383 results provide a more precise case assessment of the promotion of biodiversity in revegetated drylands.

384 In the results, the pattern of niche driving to microbial was supported by some studies on crops  
385 (Xiong et al., 2021a, b) and wild plants (Cregger et al., 2018; Zheng and Gong, 2019; Wang et al., 2022)  
386 from local to regional areas. However, recent studies have shown that fungal compositional variance is  
387 better predicted by sampled sites than by microhabitats in regional areas (Bernard et al., 2021; Thiergart  
388 et al., 2020). This phenomenon was confirmed in the present study site where the four shrubs encountered  
389 similar growth conditions (soil and climate) but the numerous microenvironment properties (e.g.,  
390 nutrients, temperature, humidity, and plant immunity) varied remarkably across the soils and plant tissues.  
391 Moreover, the microbial co-occurrence network analysis indicated that the different topological  
392 structures (i.e., network complexity, modularity, clustering coefficient, and hub node) between soils and  
393 plant habitats influenced the bacterial communities more than the fungal communities (Figures. 1 and 5;  
394 Tables S5 and S6). Another explanation may be that fungi are more easily affected by environmental  
395 conditions due to the existence of some fungal communities not directly associated with a plant (Gao et  
396 al., 2020). Additionally, in desert soil with low nutrients, plants supply most of the soil organic matter  
397 for microbiomes, consequently resulting in a strong relationship between plants and microbes (Hu et al.,  
398 2021). All these evidences suggested that, after revegetation in drylands, the recruitment and  
399 domestication to soil microbiome could depend on host selection and microhabitat differentiation caused  
400 by different plant species.

401 Notably, revegetated shrubs had significantly different strategies for microbiomes colonisation  
402 (Figures. 1–3, S1, and S3), implying that this process majorly influences the soil health and  
403 multifunctionality. Plants create several microhabitats (phylloplane, detritosphere, root rhizoplane,  
404 rhizosphere) with drastic environmental conditions for colonisation of the surrounding microbiome  
405 (Cordovez et al., 2019; Trivedi et al., 2020). In addition, plants also supply different litters and secretions  
406 to attract microbiomes and adapt secretion components according to the environmental changes  
407 (Zhalnina et al., 2018). For example, in phosphorus-limited soils, legume roots mainly secrete citric acid,  
408 fumaric, malonic, succinic, and malic acids, which are favourable for Proteobacteria growth, whereas in  
409 phosphorus-rich soils, there are high levels of exudates of citrate, malate, and oxalate, stimulating growth  
410 of Acidobacteria (Dai et al., 2020). Volatile oil from *A. ordosica* influences the growth of desert soil  
411 microalgae *Palmellococcus miniatus*, thereby, affecting the surrounding microbiomes (Yang et al., 2012).  
412 Thus, the role of plant natural accessions (i.e., root exudate, root litter, leaf litter) on the microbiome  
413 assembly should be intensively studied.

414 The co-occurrence network in the plantations had a lower complexity and clustering coefficient and  
415 a higher average path distance than those in bare sandy land, indicating a less compact microbial  
416 association in the plant compartments than in bare sandy land (Figures. 5a, b, Tables S5 and S6). Plant  
417 inputs (litter and exudates) change the cross-feeding relationships of microbes (Malik et al., 2020), which  
418 reduces belowground competition for organic matter (Hu et al., 2021). The encroachment of plants results  
419 in changes in the microenvironment (i.e., air temperature, soil erosion, and edaphic properties), which  
420 indirectly affects the microbial community and their associations (Hu et al., 2021). In contrast, in bare  
421 sandy land with limited nutrition, metabolic exchange likely promotes microbial survival and assembly  
422 (Leff et al., 2017). These results imply that the microbial compositions of non-plant and plant land are

423 largely shaped by metabolic interactions and resource competition, respectively. Although our study  
424 provides some insights into the mechanisms underlying the plant microbiomes, longitudinal experiments  
425 should be conducted (Bai et al., 2020).

426 In this study, the highest network complexities were found in the phylloplane and root rhizoplane,  
427 respectively for bacteria and fungi in shrublands (Figures. 5a, b; Table S5). This could be explained by  
428 intense competition for nutrition at the interface (roots and leaves) between the plant and the environment  
429 (Mommer et al., 2016; Remus-Emsermann and Schlechter, 2018). Broad ecological differences in  
430 substrate preferences, growth rates, and stress tolerance lead to distinct trajectories in bacteria and fungi  
431 during plant recovery (Sun et al., 2017). For example, fungi are generally considered as the major  
432 decomposers of recalcitrant organic matter because of their ability to produce specific enzymes (Bani et  
433 al., 2018). Additionally, mycorrhizal fungi can directly clone living plant tissues (Tedersoo et al., 2014).  
434 Hyphae filamentous fungi also provide ecological opportunities for bacteria, leading to novel host-  
435 symbiont interactions (Emmett et al., 2021; Pawlowska et al., 2018; Yuan et al., 2021). In addition,  
436 microbial spores can diffuse via attachment to motile soil bacteria (Muok et al., 2021). In summary, under  
437 harsh conditions in drylands, soil microbiomes were extraordinarily sensitive to organic matter input and  
438 microenvironment changes via revegetation. However, the response of interspecific and intraspecific  
439 interactions between microbiomes (i.e., bacteria and fungi) should have an in-depth exploration.

#### 440 *4.2. Source and sink of shrub-associated microbiota*

441 Source-tracking and nestedness analysis showed that a legacy effect of the original land use on  
442 shrub-associated microbial assembly and revealed that the legacy effect of bare sandy soil on shrub -  
443 associated bacterial communities was stronger than that on shrub-associated fungal communities (Figure.  
444 5c). However, the results partially support the source-sink hypothesis. In concordance with previous

445 studies (Amend et al., 2019; Bernard et al., 2021), rhizospheric soil, not the root zone soil or bulk soil,  
446 was identified as the main species reservoir of plant-associated microbial taxa (Figure. S5), further  
447 indicating that the rhizosphere act as a hotspot of plant-microbe-soil interactions. However, another study  
448 found that plant bacterial communities are gradually filtered and enriched from bulk soils to plant niches  
449 (Xiong et al., 2021b). This could be primarily attributed to the harsher soil conditions (low nutrients and  
450 soil moisture) in the root zone and bulk soil than in the rhizosphere in the desert ecosystem. In nutrient-  
451 poor soils, the rhizosphere, being a hotspot for intense plant-soil-microbe interactions, provides a more  
452 pleasant habitat for different microbiomes than that of other soil zones (Mommer et al., 2016), since roots  
453 can change the microhabitat environments via dead litter and bioactive exudates (Hu et al., 2018). Thus,  
454 our current results, consistent with the previous investigations, show that soil microbial communities  
455 under shrub canopies and between shrub canopies have no significant difference (Sun et al., 2019). These  
456 results indicate that revegetated plants could prune the original soil microbial communities and modify  
457 soil microbiota composition in the whole shrubland. However, future research should focus on the role  
458 of shrub root traits (i.e., elongation and turnover) and soil animals (i.e., ants and nematodes) in this  
459 process.

460 Interestingly, in the present study, aboveground plant species pools also contributed to the  
461 belowground microbial communities, although microbial diversity of soils was higher than that of plant  
462 tissue. In particular, for fungal communities, phylloplane was the second largest species pool (Figure.  
463 S5b). These vertically stratified microbiota assembly patterns have also been determined in previous  
464 studies in other plant species (Amend et al., 2019). Plants specifically recruit and elaborately prune a  
465 small group of beneficial microbes from the soil pool during their lifetime (van der Heijden and Schlaeppli,  
466 2015). A considerable part of plant microbiome diversity, which affects germination and seedling



467 development, may be inherited from the seed (Walsh et al., 2021). Furthermore, experimental evidence  
468 indicates that root and phyllosphere microbes are partially inherited via vertical seed transmission  
469 (Abdelfattah et al., 2021). In clonal plants, vertical transmission between plant generations occurs in a  
470 significant proportion of symbiotic bacteria and fungi (Vannier et al., 2018). Additionally, the air  
471 microbiome contributes to phyllosphere microbiota assembly (Archer et al., 2019), which further affects  
472 the soil microbiome through rainfall and eluviation. Several fungal spores can disperse onto leaves of  
473 neighbouring plants via rain splash, even when wind flow is very low (Mukherjee et al., 2021). An  
474 alternative explanation may be that exotic herbivorous insects alter the leaf microbiome through eating  
475 leaves and carrying microorganisms, thereby, affecting the soil microbial community via litter input  
476 (Humphrey and Whiteman, 2020). Overall, the horizontal and vertical transmission pathways mostly  
477 explain the origin and dispersion of microbiomes in plants. However, other mechanisms, such as the  
478 effects of leaf-derived microbiomes on the soil microbial community and the contributions of deep soil  
479 microbiomes to plant microbiota, warrant further validation.

#### 480 4.3. *Ecological assembly processes of shrub-associated microbiota*

481 Disentangling the assembly mechanisms of plant-associated microbiomes is imperative for better  
482 understanding the role of plant in generating and maintaining microbial diversity (Trivedi et al., 2020).  
483 In this present study, quantitative analysis of assembly processes showed that bacterial and fungal  
484 communities across different microhabitats were mainly drove by determinism and stochasticity,  
485 respectively (Figure. 6a), partially in contrast to the finding of Cao et al. (2022), who detected that the  
486 stochastic processes were dominant in bacterial communities of shrublands in eastern of the Mu Us  
487 Desert. This discrepancy can be credited to the difference in precipitations. In drylands, previous studies  
488 have proven that precipitation primarily regulated microbial assembly processes, especially bacterial

489 communities (Jiao et al., 2021; Naidoo et al., 2022; Yang et al., 2022), because wetter habitats promote  
490 dispersal (Cermeño and Falkowski, 2009). In the current study, bacterial community assembly was  
491 dominantly governed by homogeneous selection of deterministic processes (Figure. 6b), indicating that  
492 bacteria across six microhabitats had more similar composition (Hanson et al., 2012; Su et al., 2020).  
493 Compared to bacterial communities, fungi communities at multiple microhabitats are predominantly  
494 govern by dispersal limitation (Bonito et al. 2014; Richter-Heitmann et al., 2020; Xu et al., 2021). Our  
495 results supported this view, the proportion of dispersal limitation in fungi at all microhabitats was higher  
496 than that in bacteria (Figure. 6b), suggesting that fungi are more limited by resource availability and are  
497 more sensitive to environmental changes than bacteria do.

## 498 **5. Conclusions**

499 Our results demonstrate that plant introduction has a much stronger influence on microbial  $\alpha$ -  
500 diversity and networks in soil microhabitats than plant microhabitats, but the effect on microbial  
501 community structure was stronger in plant tissue microhabitats than in soil microhabitats. The changes  
502 due to host effect on shrub-associated microbiome composition was stronger at the niche differentiation  
503 level rather than at the plant species level in revegetated desert shrubland. We further found that plant  
504 microbiome assembly was mainly influenced by plant select and niche filter, meanwhile, revegetated  
505 plant via microenvironment changes and microbial seedbank from parent affect soil microbial  
506 composition. Furthermore, the surrounding zone of roots is a hotspot for microbial recruitments of  
507 revegetated shrubs. Determinism played a dramatically greater role in bacterial communities than fungal  
508 communities. Of the four shrubs, *A. ordosica* exhibited the highest performance in plasticity or  
509 responsiveness of microbial communities after revegetation; thus, this shrub species is the optimal choice  
510 for increasing ecosystem biodiversity in future dryland restoration. Together these results suggest that

511 the host selection (plant niches and host genetics) and soil domestication (organic matter and microbial  
512 species seed input) drive microbial community composition and functions in revegetated ecosystems.  
513 Collectively, these findings significantly promote our fundamental understanding of the interactions  
514 between revegetated plants and microbiomes in drylands during plant introduction. In future studies, the  
515 role of plant-associated microbiomes in improving soil nutrient cycle and soil-forming processes of  
516 restoring ecosystems should be investigated in depth.

### 517 **Acknowledgments**

518 We would like to thank Dr. Chun Miao, Dr. Liang Liu, and Mr. Shijun Liu for their cooperation and  
519 assistance in experimental design and field sampling, and the staff of Guangdong Magigene  
520 Biotechnology Co., Ltd., Guangzhou, China for their generous support in laboratory work. We also thank  
521 Prof. Manuel Delgado-Baquerizo for his constructive and valuable comments and suggestions that helped  
522 us improve this article. This work was financially supported by the National Natural Science Foundation  
523 of China (Grant No. 31800611 and 31870710) and the National Key Research and Development Plan  
524 (No. 2022YFE0104700). Research on soil microbiomes in Yanchi Research Station is supported by the  
525 Fundamental Research Funds for the Central Universities (Grant No. PTYX202122 and PTYX202123).

### 526 **Author contributions**

527 Zongrui Lai and Yang Yu conceived the research idea. Zongrui Lai, Yanfei Sun, Zhen Liu, Yuxuan  
528 Bai, and Shugao Qin sampled in field. Zongrui Lai, Yang Yu, Lin Miao, and Yangui Qiao analysed the  
529 data. Zongrui Lai and Yanfei Sun participated in the preparation of this manuscript. Zongrui Lai, Yanfei  
530 Sun, and Wei Feng made the illustrations.

### 531 **Declaration of Competing Interest**

532 The authors declare that they have no competing financial interests or personal relationships that

533 could have appeared to influence the work reported in this paper.

534 **Data availability**

535 All RNA-seq data were uploaded to the NCBI Sequence Read Archive (SRA) with the accession  
536 number SRP348383.

537 **References**

538 Abdelfattah A, Wisniewski M, Schena L, Tack A. 2021. Experimental evidence of microbial inheritance  
539 in plants and transmission routes from seed to phyllosphere and root. *Environmental Microbiology*  
540 23:2199–2214. DOI: <https://doi.org/10.1111/1462-2920.15392>

541 Agler MT, Ruhe J, Kroll S, Morhenn C, Kim S-T, Weigel D, Kemen EM. 2016. Microbial hub taxa link  
542 host and abiotic factors to plant microbiome variation. *PLoS Biology* 14:e1002352. DOI:  
543 <https://doi.org/10.1371/journal.pbio.1002352>

544 Aleklett K, Rosa D, Pickles BJ, Hart MM. 2022. Community assembly and stability in the root microbiota  
545 during early plant development. *Frontiers in Microbiology* 13: 826521.  
546 <https://doi.org/10.3389/fmicb.2022.826521>

547 Amend AS, Cobian GM, Laruson AJ, Remple K, Tucker SJ, Poff KE, Antaky C, Boraks A, Jones CA,  
548 Kuehu D, Lensing BR, Pejhanmehr M, Richardson DT, Riley PP. 2019. Phytobiomes are  
549 compositionally nested from the ground up. *PeerJ* 27:e6609. DOI: <https://doi.org/10.7717/peerj.6609>

550 Archer SDJ, Lee KC, Caruso T, Maki T, Lee CK, Cary SC, Cowan DA, Maestre FT, Pointing SB. 2019.  
551 Airborne microbial transport limitation to isolated Antarctic soil habitats. *Nature Microbiology*  
552 4:925–932. DOI: <https://doi.org/10.1038/s41564-019-0370-4>

553 Arneth A, Olsson L, Cowie A, Erb H, Hurlbert M, Kurz WA, Mirzabaev A, Rounsevell MDA. 2021.  
554 Restoring degraded lands. *Annual Review of Environment and Resources* 46:569–599. DOI:

- 555 <https://doi.org/10.1146/annurev-environ-012320-054809>
- 556 Badri DV, Zolla G, Bakker MG, Manter DK, Vivanco JM. 2013. Potential impact of soil microbiomes  
557 on the leaf metabolome and on herbivore feeding behavior. *New Phytologist* 198:264–273. DOI:  
558 <https://doi.org/10.1111/nph.12124>
- 559 Bai Y, Müller DB, Srinivas G, Garrido-Oter R, Potthoff E, Rott M, Dombrowski N, Münch PC, Spaepen  
560 S, Remus-Emsermann M, Hüttel B, McHardy AC, Vorholt JA, Schulze-Lefert P. 2015. Functional  
561 overlap of the *Arabidopsis* leaf and root microbiota. *Nature* 528:364–369. DOI:  
562 <https://doi.org/10.1038/nature16192>
- 563 Bai YX, She WW, Miao L, Qin SG, Zhang YQ. 2020. Soil microbial interactions modulate the effect of  
564 *Artemisia ordosica* on herbaceous species in a desert ecosystem, northern China. *Soil Biology &*  
565 *Biochemistry* 150:108013. DOI: <https://doi.org/10.1016/j.soilbio.2020.108013>
- 566 Bani A, Pioli S, Ventura M, Panzacchi P, Borruso L, Tognetti R, Tonon G, Brusetti L. 2018. The role of  
567 microbial community in the decomposition of leaf litter and deadwood. *Applied Soil Ecology*  
568 126:75–84. DOI: <https://doi.org/10.1016/j.apsoil.2018.02.017>
- 569 Beckers B, De Beeck MO, Weyens N, Boerjan W, Vangronsveld J. 2017. Structural variability and niche  
570 differentiation in the rhizosphere and endosphere bacterial microbiome of field-grown poplar trees.  
571 *Microbiome* 5:1–17. DOI: <https://doi.org/10.1186/s40168-017-0241-2>
- 572 Berg A, McColl KA. 2021. No projected global drylands expansion under greenhouse warming. *Nature*  
573 *Climate Change* 11:331–337. DOI: <https://doi.org/10.1038/s41558-021-01007-8>
- 574 Berg G, Grube M, Schlöter M, Smalla K. 2014. Unraveling the plant microbiome: looking back and  
575 future perspectives. *Frontiers in Microbiology* 5:148. DOI:  
576 <https://doi.org/10.3389/fmicb.2014.00148>

577 Bernard J, Wall CB, Costantini MS, Rollins RL, Atkins ML, Cabrera FP, Cetraro ND, Feliciano ALG,  
578 Greene AL, Kitamura PK, Olmedo-Velarde A, Sirmalwatt VNS, Sung HW, Thompson LPM, Vu HT,  
579 Wilhite CJ, Amend AS. 2021. Plant part and a steep environmental gradient predict plant microbial  
580 composition in a tropical watershed. *The ISME Journal* 15:999–1009. DOI:  
581 <https://doi.org/10.1038/s41396-020-00826-5>

582 Bulgarelli D, Rott M, Schlaeppi K, Van Themaat EVL, Ahmadinejad N, Assenza F, Rauf P, Huettel B,  
583 Reinhardt R, Schmelzer E, Peplies J, Gloeckner FO, Amann R, Eickhorst T, Schulze-Lefert P. 2012.  
584 Revealing structure and assembly cues for *Arabidopsis* root inhabiting bacterial microbiota. *Nature*  
585 488:91–95. DOI: <https://doi.org/10.1038/nature11336>

586 Caporaso JG, Kuczynski J, Stombaugh J, Bittinger K, Bushman FD, Costello EK, Fierer N, Peña AG,  
587 Goodrich JK, Gordon JI, Huttley GA, Kelley ST, Knights D, Koenig JE, Ley RE, Lozupone CA,  
588 McDonald D, Muegge BD, Pirrung M, Reeder J, Sevinsky JR, Turnbaugh PJ, Walters WA, Widmann  
589 J, Yatsunenko T, Zaneveld J, Knight R. 2010. QIIME allows analysis of high-throughput community  
590 sequencing data. *Nature Methods* 7:335–336. DOI: <https://doi.org/10.1038/nmeth.f.303>

591 Cermeño P, Falkowski PG. 2009. Controls on diatom biogeography in the ocean. *Science* 325:1539–  
592 1541. DOI: <https://doi.org/10.1126/science.1174159>

593 Cordovez V, Dini-Andreote F, Carrión VJ, Raaijmakers JM. 2019. Ecology and Evolution of plant  
594 microbiomes. *Annual Review of Microbiology* 73:69–88. DOI: <https://doi.org/10.1146/annurev-micro-090817-062524>

596 Cregger MA, Veach AM, Yang ZK, Crouch MJ, Vilgalys R, Tuskan GA, Schadt CW. 2018. The *Populus*  
597 holobiont: dissecting the effects of plant niches and genotype on the microbiome. *Microbiome* 6: 1–  
598 14. DOI: <https://doi.org/10.1186/s40168-018-0413-8>

599 Dai ZM, Liu GF, Chen HH, Chen CR, Wang JK, Ai SY, Wei D, Li DM, Ma B, Tang CX, Brookes PC,  
600 Xu JM. 2020. Long-term nutrient inputs shift soil microbial functional profiles of phosphorus cycling  
601 in diverse agroecosystems. *The ISME Journal* 14:757–770. DOI: [https://doi.org/10.1038/s41396-](https://doi.org/10.1038/s41396-019-0567-9)  
602 019-0567-9

603 Delgado-Baquerizo M, Reich PB, Trivedi C, Eldridge DJ, Abades S, Alfaro FD, Bastida F, Berhe AA,  
604 Cutler NA, Gallardo A, García-Velázquez L, Hart SC, Hayes PE, He JZ, Hseu ZY, Hu HW, Kirchmair  
605 M, Neuhauser S, Pérez CA, Reed SC, Santos F, Sullivan BW, Trivedi P, Wang JT, Weber-Grullon L,  
606 Williams MA, Singh BK. 2020. Multiple elements of soil biodiversity drive ecosystem functions  
607 across biomes. *Nature Ecology & Evolution* 4:210–220. DOI: [https://doi.org/10.1038/s41559-019-](https://doi.org/10.1038/s41559-019-1084-y)  
608 1084-y

609 DeSantis TZ, Hugenholtz P, Larsen N, Rojas M, Brodie EL, Keller K, Huber T, Dalevi D, Hu P, Anderson  
610 GL. 2006. Greengenes, a chimera-checked 16S rRNA gene database and workbench compatible with  
611 ARB. *Applied and Environmental Microbiology* 72:5069–5072. DOI:  
612 <https://doi.org/10.1128/AEM.03006-05>

613 Durán P, Thiery T, Garrido-Oter R, Alger M, Kemen E, Schulze-Lefert P, Hacquard S. 2018. Microbial  
614 interkingdom interactions in roots promote *Arabidopsis* survival. *Cell* 175:973–983. DOI:  
615 <https://doi.org/10.1016/j.cell.2018.10.020>

616 Edgar RC. 2010. Search and clustering orders of magnitude faster than BLAST. *Bioinformatics* 26:2460–  
617 2461. DOI: <https://doi.org/10.1093/bioinformatics/btq461>

618 Edwards J, Johnson C, Santos-Medellin C, Lurie E, Podishetty NK, Bhatnagar S, Eisen JA, Sundaresan  
619 V. 2015. Structure, variation, and assembly of the root-associated microbiomes of rice. *Proceedings*  
620 *of the National Academy of Sciences of the United States of America* 112:E911–E920. DOI:

- 621 <https://doi.org/10.1073/pnas.1414592112>
- 622 Emmett BD, Lévesque-Tremblay V, Harrison MJ. 2021. Conserved and reproducible bacterial  
623 communities associate with extraradical hyphae of arbuscular mycorrhizal fungi. *The ISME Journal*  
624 15:2276–2288. DOI: <https://doi.org/10.1038/s41396-021-00920-2>
- 625 Gao C, Montoya L, Xu L, Madera M, Hollingsworth J, Purdom E, Singan V, Vogel J, Hutmacher RB,  
626 Dahlberg JA, Coleman-Derr D, Lemaux PG, Taylor JW. 2020. Fungal community assembly in  
627 drought-stressed sorghum shows stochasticity, selection, and universal ecological dynamics. *Nature*  
628 *Communications* 11:1–14. DOI: <https://doi.org/10.1038/s41467-019-13913-9>
- 629 Gunnigle E, Frossard A, Ramond JB, Guerrero L, Seely M, Cowan DA. 2017. Diel-scale temporal  
630 dynamics recorded for bacterial groups in Namib Desert soil. *Scientific Reports* 7:40189. DOI:  
631 <https://doi.org/10.1038/srep40189>
- 632 Gupta R, Elkabetz D, Leibman-Markus M, Sayas T, Schneider A, Jami E, Kleiman M, Bar M. 2021.  
633 Cytokinin drives assembly of the phyllosphere microbiome and promotes disease resistance through  
634 structural and chemical cues. *The ISME Journal* 16: 1–6. DOI: [https://doi.org/10.1038/s41396-021-](https://doi.org/10.1038/s41396-021-01060-3)  
635 [01060-3](https://doi.org/10.1038/s41396-021-01060-3)
- 636 Hanson CA, Fuhrman JA, Horner-Devine MC, Martiny JBH. 2012. Beyond biogeographic patterns:  
637 processes shaping the microbial landscape. *Nature Reviews Microbiology* 10:497–506. DOI:  
638 <https://doi.org/10.1038/nrmicro2795>
- 639 Hartman K, van der Heijden MG, Wittwer RA, Banerjee S, Walser JC, Schlaeppi K. 2018. Cropping  
640 practices manipulate abundance patterns of root and soil microbiome members paving the way to  
641 smart farming. *Microbiome* 6:1–14. DOI: <https://doi.org/10.1186/s40168-017-0389-9>
- 642 Hu LF, Robert CAM, Cadot S, Zhang X, Ye M, Li BB, Manzo D, Chervet N, Steinger T, van der Heijden



- 643 MGA, Schlaeppi K, Erb M. 2018. Root exudate metabolites drive plant-soil feedbacks on growth and  
644 defense by shaping the rhizosphere microbiota. *Nature Communications* 9:1–13. DOI:  
645 <https://doi.org/10.1038/s41467-018-05122-7>
- 646 Humphrey PT, Whiteman NK. 2020. Insect herbivory reshapes a native leaf microbiome. *Nature Ecology  
647 & Evolution* 4:221–229. DOI: <https://doi.org/10.1038/s41559-019-1085-x>
- 648 Hu WG, Ran JZ, Dong LW, Du QJ, Ji MF, Yao SR, Sun Y, Gong CM, Hou QQ, Gong HY, Chen RF, Lu  
649 JL, Xie SB, Wang ZQ, Huang H, Li XW, Xiong JL, Xia R, Wei MH, Zhao DM, Zhang YH, Li JH,  
650 Yang HX, Wang XT, Deng Y, Sun Y, Li HL, Zhang L, Chu QP, Li XW, Aqeel M, Manan A, Akram  
651 MA, Liu XH, Li R, Li F, Hou C, Liu JQ, He JS, An LZ, Bardgett RD, Schmid B, Deng JM. 2021.  
652 Aridity-driven shift in biodiversity-soil multifunctionality relationships. *Nature Communications*  
653 12:1–15. DOI: <https://doi.org/10.1038/s41467-021-25641-0>
- 654 Ihrmark K, Bödeker ITM, Cruz-Martinez K, Friberg H, Kubartova A, Schenck J, Strid Y., Stenlid J,  
655 Brandström-Durling M, Clemmensen KE, Lindahl BJ. 2012. New primers to amplify the fungal ITS2  
656 region-evaluation by 454-sequencing of artificial and natural communities. *FEMS Microbiology  
657 Ecology* 82:666–677. DOI: <https://doi.org/10.1111/j.1574-6941.2012.01437.x>
- 658 Jiao S, Chen W, Wei G. 2021. Linking phylogenetic niche conservatism to soil archaeal biogeography,  
659 community assembly and species coexistence. *Global Ecology and Biogeography* 30:1488–1501.  
660 DOI: <https://doi.org/10.1111/geb.13313>
- 661 Kembel SW, Cowan PD, Helmus MR, Cornwell WK, Morlon H, Ackerly DD, Blomberg SP, Webb CO.  
662 2010. Picante: R tools for integrating phylogenies and ecology. *Bioinformatics* 26:1463–1464. DOI:  
663 <https://doi.org/10.1093/bioinformatics/btq166>.
- 664 Kembel SW, O’Connor TK, Arnold HK, Hubbell SP, Wright SJ, Green JL. 2014. Relationships between

- 665 phyllosphere bacterial communities and plant functional traits in a neotropical forest. Proceedings of  
666 the National Academy of Sciences of the United States of America 111:13715–13720. DOI:  
667 <https://doi.org/10.1073/pnas.1216057111>
- 668 Knights D, Kuczynski J, Charlson ES, Zaneveld J, Mozer MC, Collman RG, Bushman FD, Knight R,  
669 Kelley ST. 2011. Bayesian community-wide culture-independent microbial source tracking. Nature  
670 Methods 8:761–763. DOI: <https://doi.org/10.1038/nmeth.1650>
- 671 Lai ZR, Zhang YQ, Liu JB, Wu B, Qin SG, Fa KY. 2016. Fine-root distribution, production,  
672 decomposition, and effect on soil organic carbon of three revegetation shrub species in northwest  
673 China. Forest Ecology and Management 359:381–388. DOI:  
674 <https://doi.org/10.1016/j.foreco.2015.04.025>
- 675 Lebeis SL, Paredes SH, Lundberg DS, Breakfield N, Gehring J, McDonald M, Malfatti S, del Rio TG,  
676 Jones CD, Tringe SG, Dangl JL. 2015. Salicylic acid modulates colonization of the root microbiome  
677 by specific bacterial taxa. Science 349:860–864. DOI: <https://doi.org/10.1126/science.aaa8764>
- 678 Leff JW, Lynch RC, Kane NC, Fierer N. 2017. Plant domestication and the assembly of bacterial and  
679 fungal communities associated with strains of the common sunflower, *Helianthus annuus*. New  
680 Phytologist 214:412–423. DOI: <https://doi.org/10.1111/nph.14323>
- 681 Liu Z, Sun YF, Zhang YQ, Feng W, Lai ZR, Fa KY, Qin SG. 2018. Metagenomic and <sup>13</sup>C tracing evidence  
682 for autotrophic atmospheric carbon absorption in a semiarid desert. Soil Biology & Biochemistry  
683 125:156–166. DOI: <https://doi.org/10.1016/j.soilbio.2018.07.012>
- 684 Love MI, Huber W, Anders S. 2014. Moderated estimation of fold change and dispersion for RNA-Seq  
685 data with DESeq2. Genome Biology 15:550. DOI: <https://doi.org/10.1186/s13059-014-0550-8>.
- 686 Lundberg DS, Yourstone S, Mieczkowski P, Jones CD, Dangl JL. 2013. Practical innovations for high-

687 throughput amplicon sequencing. *Nature Methods* 10:999–1002. DOI:  
688 <https://doi.org/10.1038/nmeth.2634>

689 Maestre FT, Benito BM, Berdugo M, Concostrina-Zubiri L, Delgado-Baquerizo M, Eldridge DJ, Guirado  
690 E, Gross N, Kéfi S, Bagouse-Pingust YL, Ochoa-Hueso R, Soliveres S. 2021. Biogeography of global  
691 drylands. *New Phytologist* 231:540–558. DOI: <https://doi.org/10.1111/nph.17395>

692 Maestre FT, Delgado-Baquerizo M, Jeffries TC, Eldridge DJ, Ochoa V, Gozalo B, Quero JL, García-  
693 Gómez M, Gallardo A, Ulrich W, Bowker MA, Arredondo T, Barraza-Zepeda C, Bran D, Florentino  
694 A, Gaitán J, Gutiérrez JR, Huber-Sannwald E, Jankju M, Mau RL, Miriti M, Naseri K, Ospina A,  
695 Stavi I, Wang D, Woods NN, Yuan X, Zaady E, Singh BK. 2015. Increasing aridity reduces soil  
696 microbial diversity and abundance in global drylands. *Proceedings of the National Academy of*  
697 *Sciences of the United States of America* 112:15684–15689. DOI:  
698 <https://doi.org/10.1073/pnas.1516684112>

699 Malik AA, Swenson T, Weihe C, Morrison EW, Martiny JBH, Brodie EL, Northen TR, Allison SD. 2020.  
700 Drought and plant litter chemistry alter microbial gene expression and metabolite production. *The*  
701 *ISME Journal* 14:2236–2247. DOI: <https://doi.org/10.1038/s41396-020-0683-6>

702 Mommer L, Hinsinger P, Prigent-Combaret C, Visser EJW. 2016. Advances in the rhizosphere: stretching  
703 the interface of life. *Plant and Soil* 407:1–8. DOI: <https://doi.org/10.1007/s11104-016-3040-9>

704 Mukherjee R, Gruszecki HA, Bilyeu LT, Schmale III DG, Boreyko JB. 2021. Synergistic dispersal of  
705 plant pathogen spores by jumping-droplet condensation and wind. *Proceedings of the National*  
706 *Academy of Sciences of the United States of America* 118:e2106938118. DOI:  
707 <https://doi.org/10.1073/pnas.2106938118>

708 Müller DB, Vogel C, Bai Y, Vorholt JA. 2016. The plant microbiota: systems-level insights and

- 709 perspectives. *Annual Review of Genetics* 50:211–234. DOI: [https://doi.org/10.1146/annurev-genet-](https://doi.org/10.1146/annurev-genet-120215-034952)
- 710 [120215-034952](https://doi.org/10.1146/annurev-genet-120215-034952)
- 711 Muok AR, Claessen D, Briegel A. 2021. Microbial hitchhiking: how streptomyces spores are transported
- 712 by motile soil bacteria. *The ISME Journal* 15:2591–2600. DOI: [https://doi.org/10.1038/s41396-021-](https://doi.org/10.1038/s41396-021-00952-8)
- 713 [00952-8](https://doi.org/10.1038/s41396-021-00952-8)
- 714 Naidoo Y, Valverde A, Pierneef RE, Cowan DA. 2022. Differences in precipitation regime shape
- 715 microbial community composition and functional potential in Namib desert soils. *Microbial Ecology*,
- 716 [83:689–701](https://doi.org/10.1007/s00248-021-01785-w). DOI: <https://doi.org/10.1007/s00248-021-01785-w>
- 717 Oksanen J, Blanchet FG, Friendly M, Kindt R, Legendre P, Oksanen MJ, Wagner H. 2019. *Vegan:*
- 718 *Community ecology package*. R package version 2.5-6. DOI: [https://CRAN.R-](https://CRAN.R-project.org/package=vegan)
- 719 [project.org/package=vegan](https://CRAN.R-project.org/package=vegan).
- 720 Pawlowska TE, Gaspar ML, Lastovetsky OA, Mondo SJ, Real-Ramirez I, Shakya E, Bonfante P. 2018.
- 721 *Biology of fungi and their bacterial endosymbionts*. *Annual Review of Phytopathology* 56:289–309.
- 722 DOI: <https://doi.org/10.1146/annurev-phyto-080417-045914>
- 723 Philippot L, Raaijmakers JM, Lemanceau P, van der Putten WH. 2013. Going back to the roots: the
- 724 microbial ecology of the rhizosphere. *Nature Reviews Microbiology* 11: 789–799. DOI:
- 725 <https://doi.org/10.1038/nrmicro3109>
- 726 Remus-Emsermann MNP, Schlechter RO. 2018. Phyllosphere microbiology: at the interface between
- 727 microbial individuals and the plant host. *New Phytologist* 218:1327–1333. DOI:
- 728 <https://doi.org/10.1111/nph.15054>
- 729 Richter-Heitmann T, Hofner B, Krah FS, Sikorski J, Wüst PK, Bunk B, Huang S, Regan KM, Berner D,
- 730 Boeddinghaus RS, Marhan S, Prati D, Kandeler E, Overmann J, Friedrich MW. 2020. Stochastic

731 dispersal rather than deterministic selection explains the spatio-temporal distribution of soil bacteria  
732 in a temperate grassland. *Frontiers in microbiology* 11:1391. DOI:  
733 <https://doi.org/10.3389/fmicb.2020.01391>

734 Schloss PD, Westcott SL, Ryabin T, Hall JR, Hartman M, Hollister EM, Lesniewski RA, Oakley BB,  
735 Parks DH, Robinson CJ, Sahl JW, Stres B, Thallinger GG, Horn DJV, Weber CF. 2009. Introducing  
736 mothur: Open-source, platform-independent, community-supported software for describing and  
737 comparing microbial communities. *Applied Environmental Microbiology* 75:7537–7541. DOI:  
738 <https://doi.org/10.1128/AEM.01541-09>

739 Soussi A, Ferjani R, Marasco R, Guesmi A, Cherif H, Rolli E, Mapelli F, Ouzari HI, Daffonchio D, Cherif  
740 A. 2016. Plant-associated microbiomes in arid lands: diversity, ecology and biotechnological  
741 potential. *Plant and Soil* 405:357–370. DOI: <https://doi.org/10.1007/s11104-015-2650-y>

742 Sun YF, Liu Z, Zhang YQ, Lai ZR, She WW, Bai YX, Feng W, Qin SG. 2020. Microbial communities  
743 and their genetic repertoire mediate the decomposition of soil organic carbon pools in revegetation  
744 shrublands in a desert in northern China. *European Journal of Soil Science* 71:93–105. DOI:  
745 <https://doi.org/10.1111/ejss.12824>

746 Sun YF, Zhang YQ, Feng W, Qin SG, Liu Z. 2019. Revegetated shrub species recruit different soil fungal  
747 assemblages in a desert ecosystem. *Plant and Soil* 453:81–93. DOI: [https://doi.org/10.1007/s11104-](https://doi.org/10.1007/s11104-018-3877-1)  
748 [018-3877-1](https://doi.org/10.1007/s11104-018-3877-1)

749 Sun S, Li S, Avera BN, Strahm BD, Badgley BD. 2017. Soil bacterial and fungal communities show  
750 distinct recovery patterns during forest ecosystem restoration. *Applied Environmental Microbiology*  
751 83:e00966-17. DOI: <https://doi.org/10.1128/AEM.00966-17>

752 Su YG, Liu J, Zhang BC, Zhao HM, Huang G. 2020. Habitat-specific environmental factors regulate

753 spatial variability of soil bacterial communities in biocrusts across northern China's drylands. The  
754 Science of the Total Environment 719:137479. DOI: <https://doi.org/10.1016/j.scitotenv.2020.137479>

755 Tedersoo L, Bahram M, Põlme S, Kõljalg U, Yorou NS, Wijesundera R, Ruiz LV, Vasco-Palacios AM,  
756 Thu PQ, Suija A, Smith ME, Sharp C, Saluveer E, Saitta A, Rosas M, Riit T, Ratkowsky D, Pritsch K,  
757 Põldmaa K, Piepenbring M, Phosri C, Peterson M, Parts K, Pärtel K, Otsing E, Nouhra E, Njouonkou  
758 AL, Nilsson RH, Morgado LN, Mayor J, May TW, Majuakim L, Lodge DJ, Lee SS, Larsson K-H,  
759 Kohout P, Hosaka K, Hiiesalu I, Henkel TW, Harend H, Guo LD, Greslebin A, Grelet G, Geml J, Gates  
760 G, Dunstan W, Dunk C, Drenkhan R, Dearnaley J, De Kesel A, Dang T, Chen X, Buegger F, Brearley  
761 FQ, Bonito G, Anslan S, Abell S, Abarenkov K. 2014. Fungal biogeography. Global diversity and  
762 geography of soil fungi. Science 346:1256688. DOI: <https://doi.org/10.1126/science.1256688>

763 Thiergart T, Durán P, Ellis T, Vannier N, Garrido-Oter R, Kemen E, Roux F, Alonso-Blanco C, Ågren J,  
764 Schulze-Lefert P, Hacquard S. 2020. Root microbiota assembly and adaptive differentiation among  
765 European *Arabidopsis* populations. Nature Ecology & Evolution 4:122–131. DOI:  
766 <https://doi.org/10.1038/s41559-019-1063-3>

767 Tripathi BM, Stegen JC, Kim M, Dong K, Adams JM, Lee YK. 2018. Soil pH mediates the balance  
768 between stochastic and deterministic assembly of bacteria. The ISME Journal 12:1072–1083. DOI:  
769 <https://doi.org/10.1038/s41396-018-0082-4>

770 Trivedi C, Reich PB, Maestre FT, Hu HW, Singh BK, Delgado-Baquerizo M. 2019. Plant-driven niche  
771 differentiation of ammonia-oxidizing bacteria and archaea in global drylands. The ISME Journal  
772 13:2727–2736. DOI: <https://doi.org/10.1038/s41396-019-0465-1>

773 Trivedi P, Leach JE, Tringe SG, Sa TM, Singh BK. 2020. Plant-microbiome interactions: from  
774 community assembly to plant health. Nature Reviews Microbiology 18:607–621. DOI:

- 775 <https://doi.org/10.1038/s41579-020-0412-1>
- 776 Turner TR, James EK, Poole PS. 2013. The plant microbiome. *Genome biology* 14:1–10. DOI:
- 777 <https://doi.org/10.1186/gb-2013-14-6-209>
- 778 Vandenkoornhuyse P, Quaiser A, Duhamel M, Le Van A, Dufresne A. 2015. The importance of the
- 779 microbiome of the plant holobiont. *New Phytologist* 206:1196–1206. DOI:
- 780 <https://doi.org/10.1111/nph.13312>
- 781 van der Heijden, M.G., Schlaeppi, K., 2015. Root surface as a frontier for plant microbiome research. *P.*
- 782 *Natl. Acad. Sci. USA* 112, 2299–2300. <https://doi.org/10.1073/pnas.1500709112>
- 783 Vannier N, Mony C, Bittebiere AK, Michon-Coudouel S, Biget M, Vandenkoornhuyse P. 2018. A
- 784 microorganisms' journey between plant generations. *Microbiome* 6:1–11. DOI:
- 785 <https://doi.org/10.1186/s40168-018-0459-7>
- 786 VanWallendael A, Soltani A, Emery NC, Peixoto MM, Olsen J, Lowry DB. 2019. A molecular view of
- 787 plant local adaptation: incorporating stress-response networks. *Annual Review of Plant Biology*
- 788 70:559–583. DOI: <https://doi.org/10.1146/annurev-arplant-050718-100114>
- 789 Van Zelm E, Zhang YX, Testerink C. 2020. Salt tolerance mechanisms of plants. *Annual Review of Plant*
- 790 *Biology* 71:403–433. DOI: <https://doi.org/10.1146/annurev-arplant-050718-100005>
- 791 Walsh CM, Becker-Uncapher I, Carlson M, Fierer N. 2021. Variable influences of soil and seed-
- 792 associated bacterial communities on the assembly of seedling microbiomes. *The ISME Journal*
- 793 15:2748–2762. DOI: <https://doi.org/10.1038/s41396-021-00967-1>
- 794 Wang ZY, Wang HL, Chen ZF, Wu QZ, Huang KT, Ke Q, Zhu LY, Lu S, Tang YB, Li H, Chen LJ, Wu
- 795 LC. 2022. Ecological niche differences regulate the assembly of bacterial community in endophytic
- 796 and rhizosphere of *Eucalyptus*. *Forest Ecology and Management* 524:120521. DOI:

- 797 <https://doi.org/10.1016/j.foreco.2022.120521>
- 798 Xiong C, Zhu YG, Wang JT, Singh B, Han LL, Shen JP, Li PP, Wang GB, Wu CF, Ge AH, Zhang LM,  
799 He JZ. 2021a. Host selection shapes crop microbiome assembly and network complexity. *New*  
800 *Phytologist* 229:1091–1104. DOI: <https://doi.org/10.1111/nph.16890>
- 801 Xiong C, Singh BK, He JZ, Han YL, Li PP, Wan LH, Meng GZ, Liu SY, Wang JT, Wu CF, Ge AH, Zhang  
802 LM. 2021b. Plant developmental stage drives the differentiation in ecological role of plant bacterial  
803 and fungal microbiomes. *Microbiome* 9:1–15. DOI: <https://doi.org/10.1186/s40168-021-01118-6>
- 804 Xu A, Liu J, Guo Z, Wang C, Pan K, Zhang F, Pan X. 2021. Distinct assembly processes and determinants  
805 of soil microbial communities between farmland and grassland in arid and semiarid areas. *Applied*  
806 *and Environmental Microbiology* 87:e01010-21. DOI: <https://doi.org/10.1128/AEM.01010-21>
- 807 Xu L, Pierroz G, Wipf HM-L, Gao C, Taylor JW, Lemaux PG, Coleman-Derr D. 2021. Holo-omics for  
808 deciphering plant-microbiome interactions. *Microbiome* 9:1–11. DOI:  
809 <https://doi.org/10.1186/s40168-021-01014-z>
- 810 Yang L, Ning D, Yang Y, He N, Li X, Cornell CR, Bates CT, Filimonenko E, Kuzyakov Y, Zhou JZ, Yu  
811 GR, Tian J. 2022. Precipitation balances deterministic and stochastic processes of bacterial  
812 community assembly in grassland soils. *Soil Biology and Biochemistry* 168:108635. DOI:  
813 <https://doi.org/10.1016/j.soilbio.2022.108635>
- 814 Yang XL, Deng SQ, De Philippis R, Chen LZ, Hu CZ. 2012. Chemical composition of volatile oil from  
815 *Artemisia ordosica* and its allelopathic effects on desert soil microalgae, *Palmellococcus miniatus*.  
816 *Plant Physiology and Biochemistry* 51:153–158. DOI: <https://doi.org/10.1016/j.plaphy.2011.10.019>
- 817 Yuan MTM, Kakouridis A, Starr E, Nguyen N, Shi SJ, Pett-Ridge J, Nuccio E, Zhou JZ, Firestone M.  
818 2021. Fungal-bacterial cooccurrence patterns differ between arbuscular mycorrhizal fungi and



- 819 nonmycorrhizal fungi across soil niches. mBio 12:e03509-20. DOI:  
820 <https://doi.org/10.1128/mBio.03509-20>
- 821 Zastrow M. 2019. China's tree-planting drive could falter in a warming world. Nature 573:474–547. DOI:  
822 <https://doi.org/10.1038/d41586-019-02789-w>
- 823 Zhalnina K, Louie KB, Hao Z, Mansoori N, da Rocha UN, Shi SJ, Cho H, Karaoz U, Loqué D, Bowen  
824 BP, Firestone MK, Northen TR, Brodie EL. 2018. Dynamic root exudate chemistry and microbial  
825 substrate preferences drive patterns in rhizosphere microbial community assembly. Nature  
826 Microbiology 3:470–480. DOI: <https://doi.org/10.1038/s41564-018-0129-3>
- 827 Zheng Y, Gong X. 2019. Niche differentiation rather than biogeography shapes the diversity and  
828 composition of microbiome of *Cycas panzhihuaensis*. Microbiome 7:1–19. DOI:  
829 <https://doi.org/10.1186/s40168-019-0770-y>

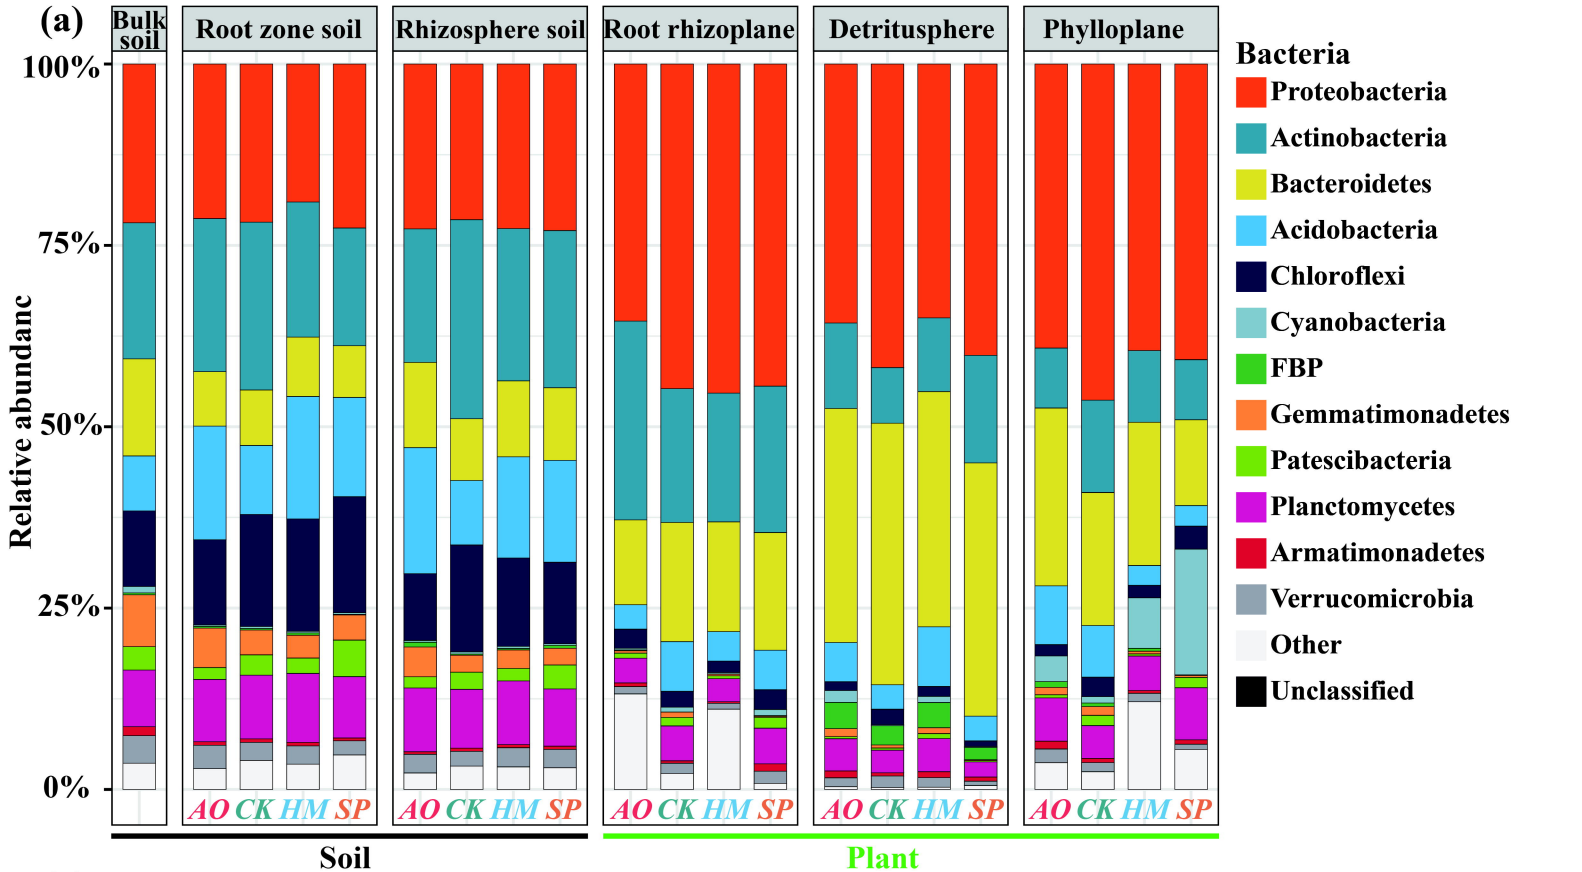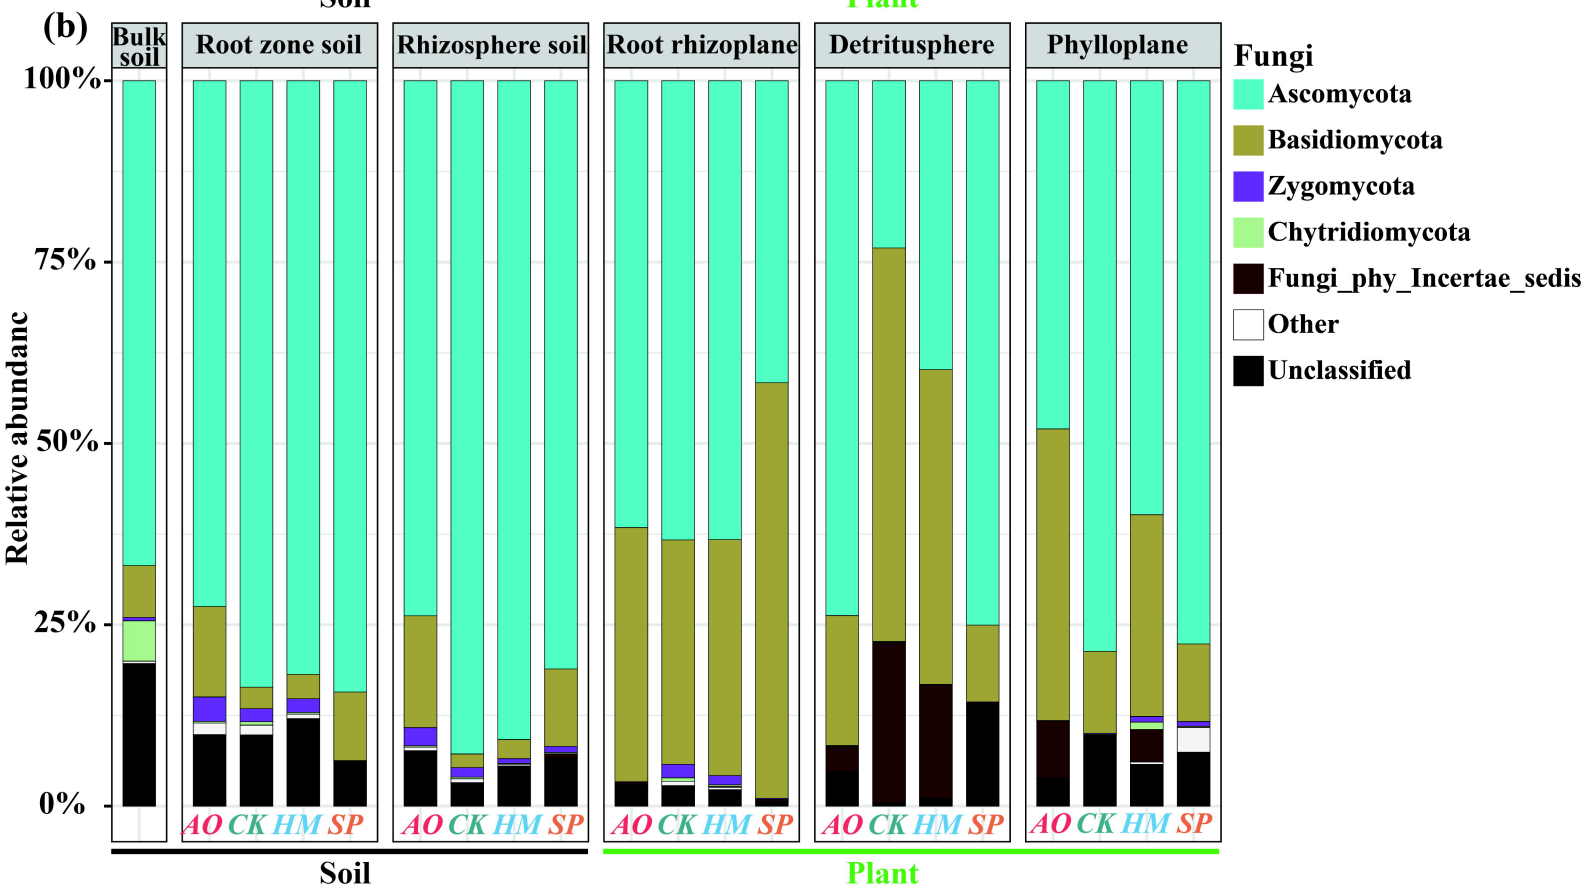

**Bacteria**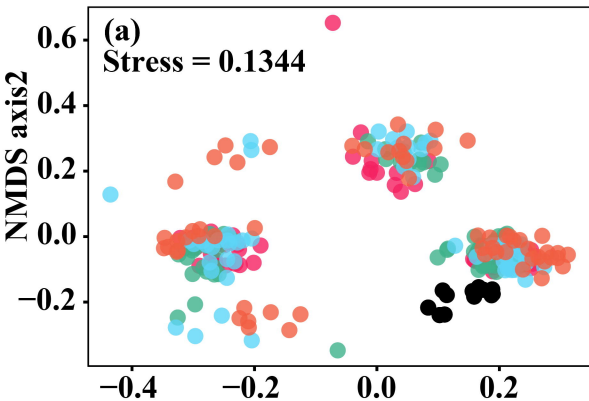**Fungi**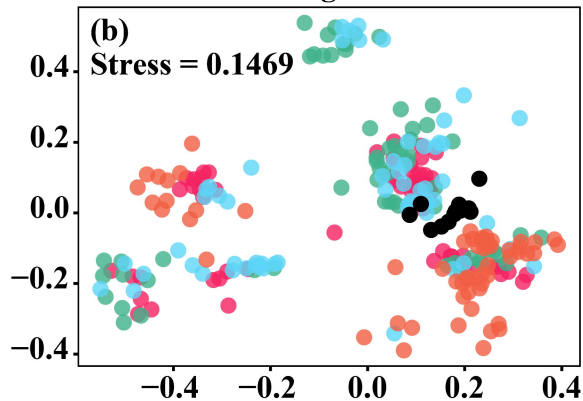

- *A. ordosica*
- *C. korshinskii*
- *H. mongolicum*
- *S. psammophila*
- Bare sandy land

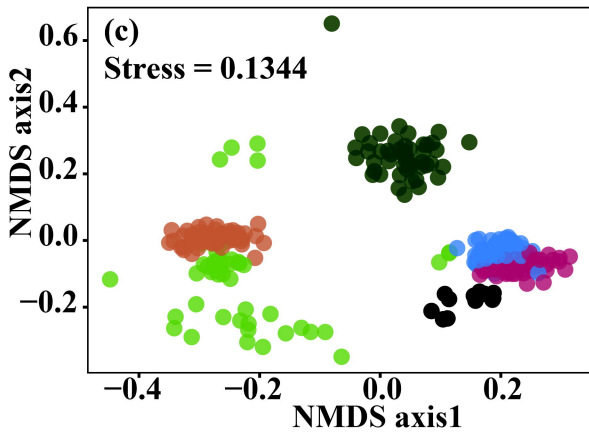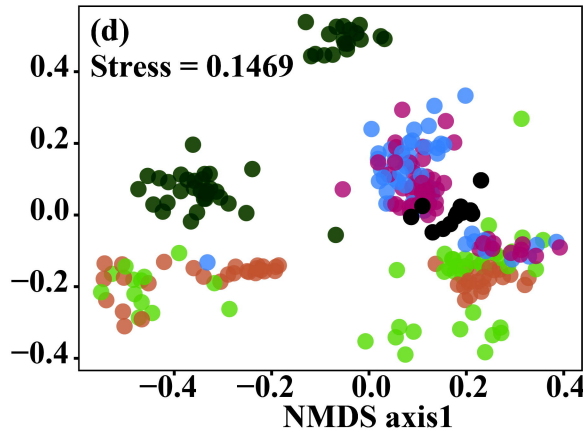

- Phylloplane
- Detritusphere
- Root rhizoplane
- Rhizosphere soil
- Root zone soil
- Bulk soil

● Depleted ● ns ● Enriched

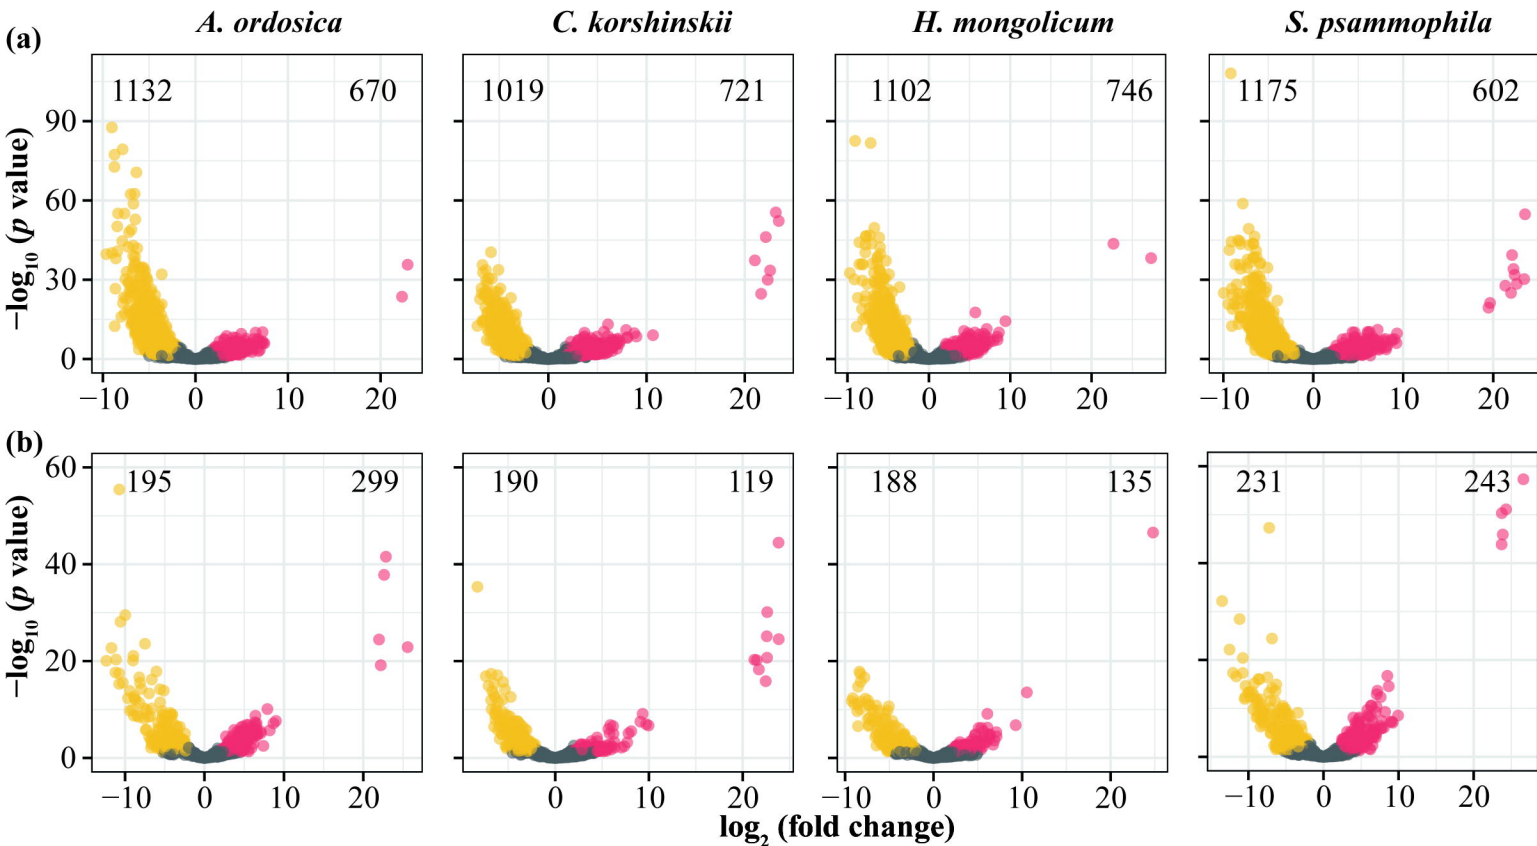

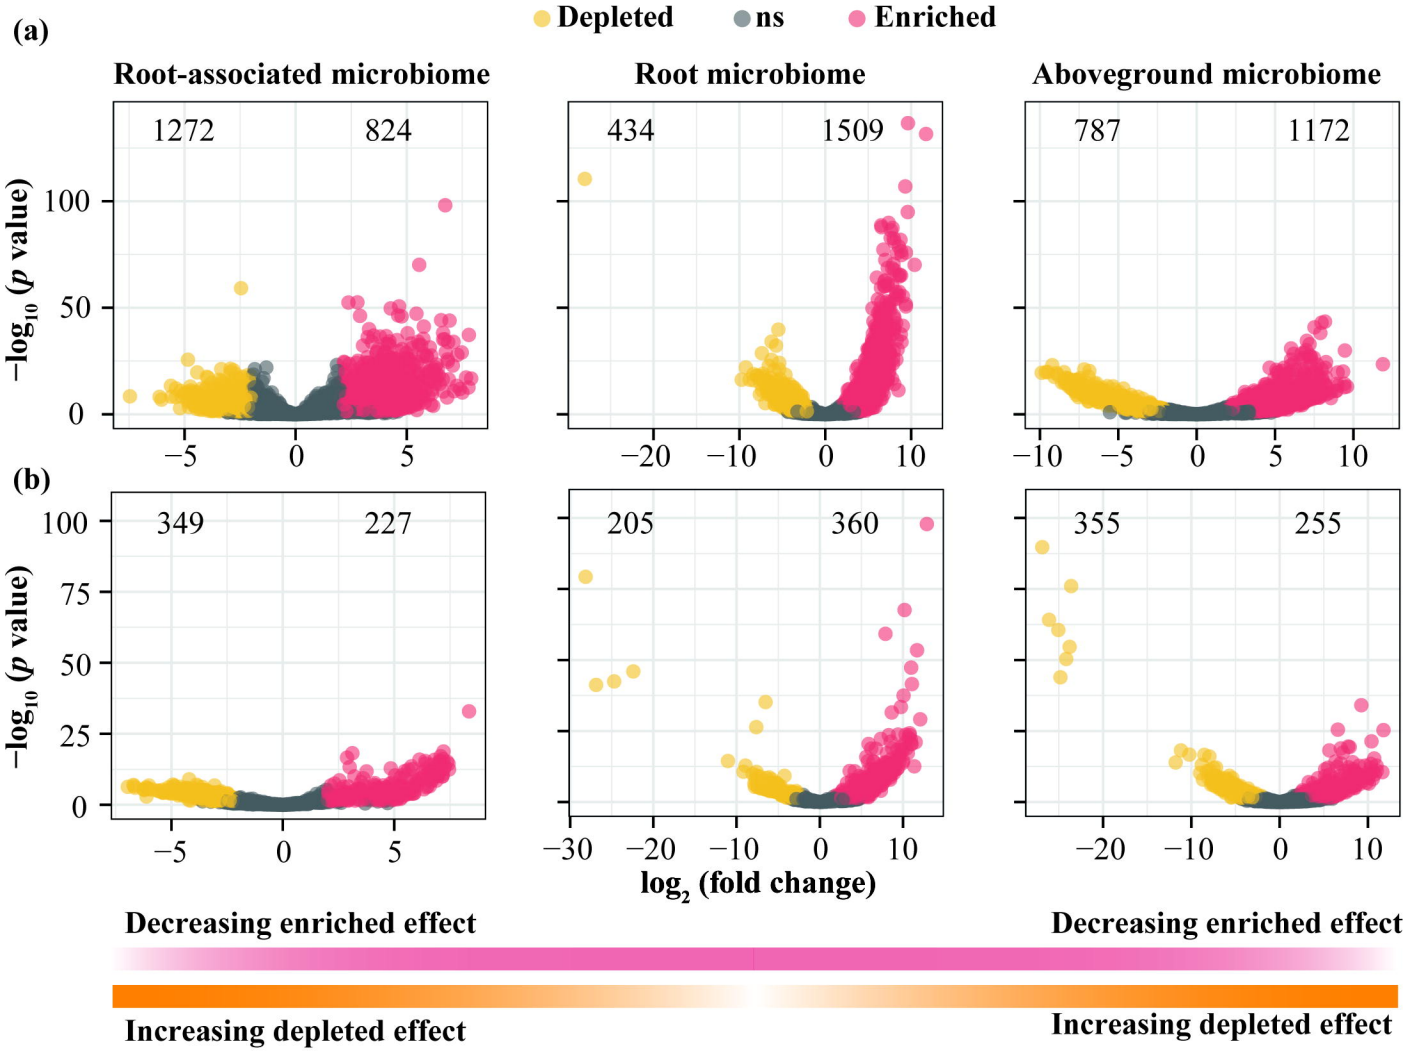

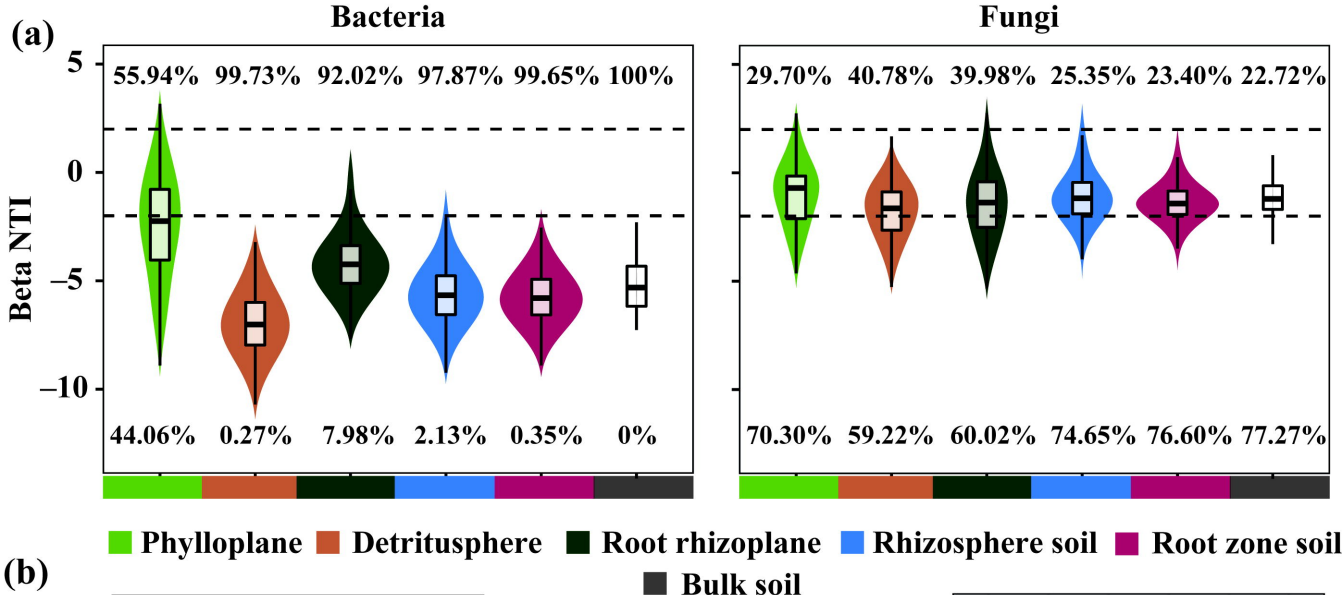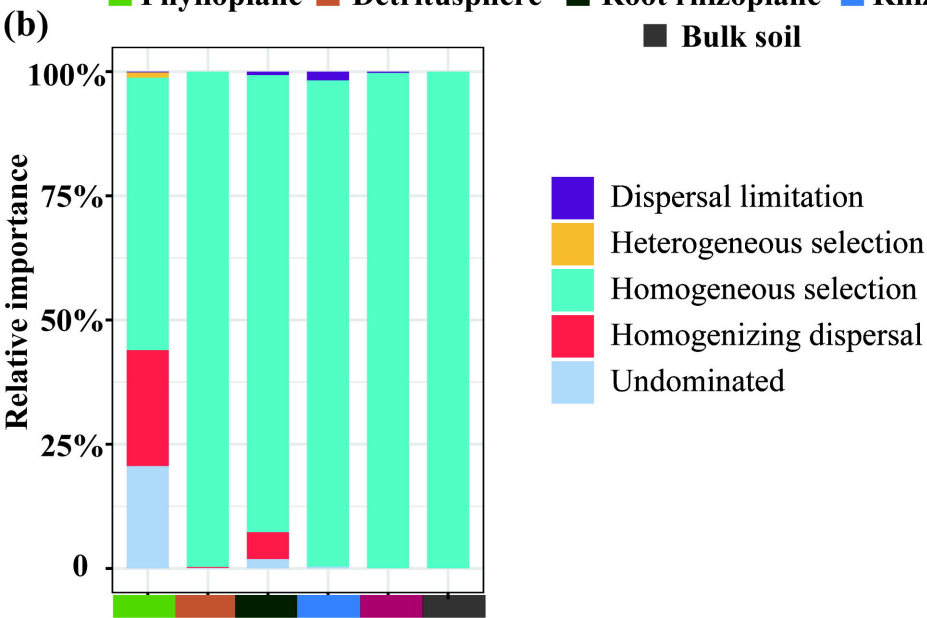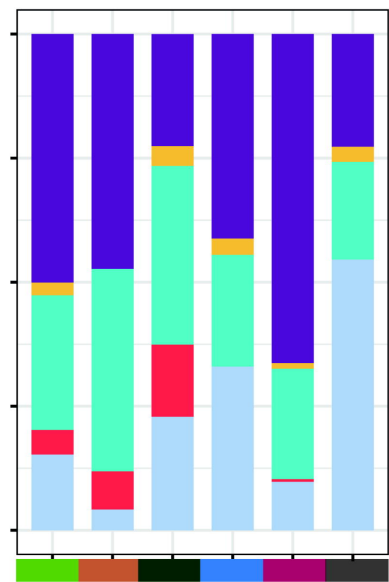

■ Phylloplane

■ Detritosphere

■ Root rhizoplane

■ Rhizosphere soil

■ Root zone soil

■ Bulk soil



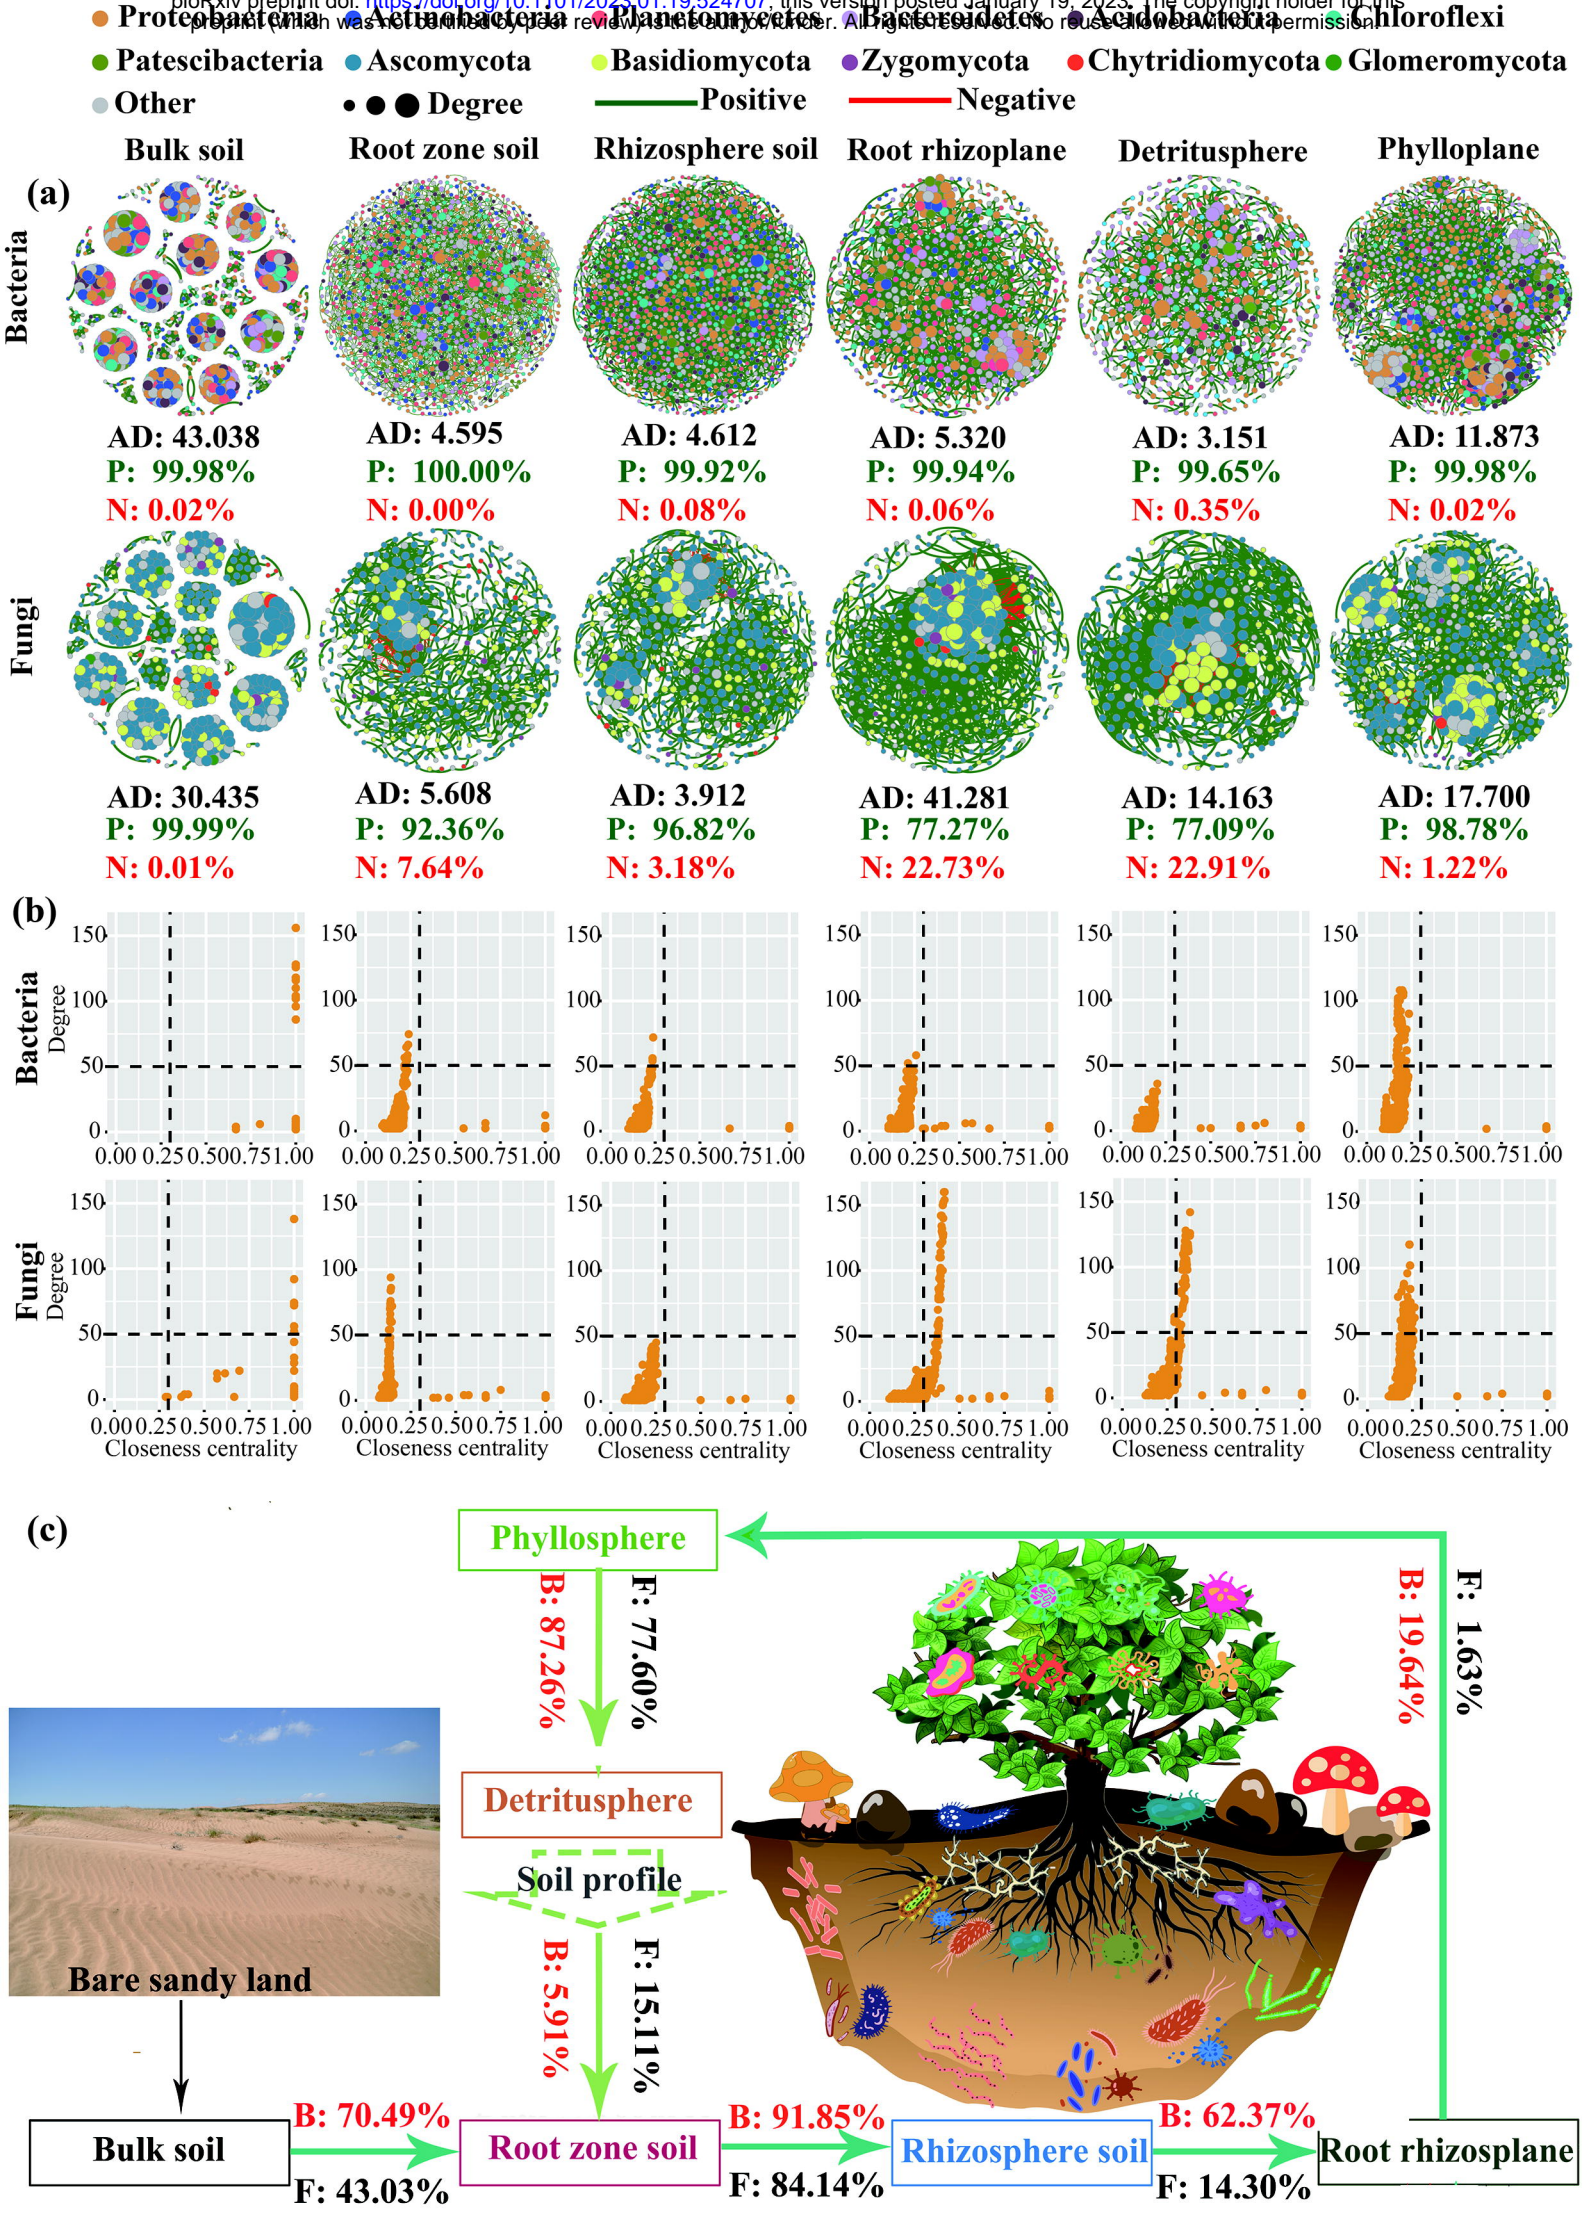

Source: https://www.biorxiv.org/content/10.1101/2023.01.19.524707v1.full.pdf
